# Supplementary material for: Synthesis of unsymmetrical ketones by applying visible-light benzophenone/nickel dual catalysis for direct benzylic acylation
Source: Royal Society of Chemistry journal article supplement (doi:10.1039/d0cc01480j), 2020-01-01

# **Synthesis of Unsymmetrical Ketones by Applying Visible-Light Benzophenone/Nickel Dual Catalysis for Direct Benzylic Acylation**

Patricia E. Krach,<sup>a</sup> Abhishek Dewanji,<sup>\*a</sup> Tingting Yuan<sup>a</sup> and Magnus Rueping <sup>\*a,b</sup>

[a] Institute of Organic Chemistry, RWTH Aachen University, Landoltweg 1, 52074 Aachen (Germany)

E-mail: magnus.rueping@rwth-aachen.de

abhishek.dewanji@rwth-aachen.de

[b] King Abdullah University of Science and Technology (KAUST), KAUST Catalysis Center (KCC), Thuwal, 23955-6900 (Saudi Arabia),

E-mail: Magnus.Rueping@Kaust.edu.sa

## Table of contents

|                                          |     |
|------------------------------------------|-----|
| General methods                          | S3  |
| Control experiments                      | S4  |
| General procedure                        | S4  |
| Characterization of ketones <b>3</b>     | S5  |
| Synthesis of <b>PS-4</b> and <b>PS-5</b> | S11 |
| Reaction with ethylbenzene               | S12 |
| References                               | S13 |
| NMR spectra                              | S14 |

## General methods:

**Reactions:** All reactions were carried out in oven-dried reaction-tubes under an argon or nitrogen atmosphere using Schlenk technique.

**Reagents:** All reagents were purchased from Sigma Aldrich, Acros Organics, Alfa Aesar, TCI, ABCR, VWR, Chempur, Fluorochem or J&K Scientific. All the reagents obtained from commercial sources were used as received unless mentioned otherwise. **Toluene** and its derivatives used were of analytical reagent grade.

**NMR Spectra:**  $^1\text{H}$  NMR,  $^{13}\text{C}$  NMR and  $^{19}\text{F}$  NMR spectra were recorded on Bruker Avance Neo 400, Avance Neo 600; Varian Mercury Plus 300, VNMRs 400 and VNMRs 600 spectrometers. Spectra were calibrated relative to solvents' residual proton and carbon chemical shifts:  $\text{CHCl}_3$  ( $\delta = 7.26$  ppm for  $^1\text{H}$  NMR and  $\delta = 77.16$  ppm for  $^{13}\text{C}$  NMR) and are reported in ppm. Coupling constants ( $J$ ) are reported in Hertz (Hz). The multiplicity of the signals is given as: s (singlet), brs (broad singlet), d (doublet), t (triplet), q (quartet), and m (multiplet).

**Thin layer chromatography (TLC)** was performed to monitor the reactions using Merck silica gel aluminium plates with F-254 indicator and detection of compounds was done under UV light (254 nm).

**Flash column chromatography (FCC)** was performed using Macherey Nagel silica gel (particle size 0.040-0.063 mm) to purify products applying air pressure of about 0.2 bar.

**Reaction setup:** Reactions were set up in reaction tubes being irradiated from two sides with two OSRAM CFL-lamps (warm white, 23 W). Cooling with a fan was applied to keep the temperature at around 35 °C.

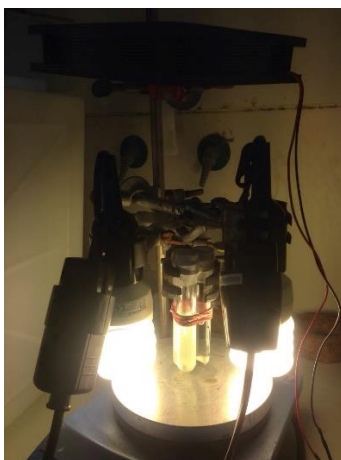

## Control experiments:

**Table S1.**

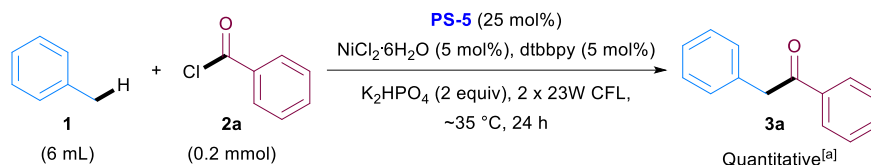

### Standard Conditions

| Entry    | Deviation from standard conditions                | Yield <sup>[a]</sup> |
|----------|---------------------------------------------------|----------------------|
| <b>1</b> | Without $\text{NiCl}_2 \cdot 6\text{H}_2\text{O}$ | 2                    |
| <b>2</b> | Without dtbbpy                                    | 2                    |
| <b>3</b> | Without <b>PS-5</b>                               | 0                    |
| <b>4</b> | In dark                                           | 0                    |
| <b>5</b> | Without $\text{K}_2\text{HPO}_4$                  | 32                   |

[a] Calculated, with  $\text{CH}_2\text{Br}_2$  (14  $\mu\text{L}$ , 0.2 mmol) as internal standard, from  $^1\text{H}$  NMR spectra.

**Table S2.**

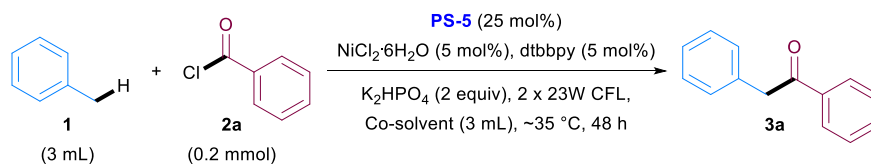

| Entry    | Co-solvent       | Yield <sup>[a]</sup> |
|----------|------------------|----------------------|
| <b>1</b> | Acetonitrile     | 80                   |
| <b>2</b> | Benzene          | 80                   |
| <b>3</b> | Benzotrifluoride | 60                   |

[a] Calculated, with  $\text{CH}_2\text{Br}_2$  (14  $\mu\text{L}$ , 0.2 mmol) as internal standard, from  $^1\text{H}$  NMR spectra.

## General procedure:

### General procedure **GP1** for the synthesis of ketones **3**:

4-Benzoylphenyl acetate (**PS-5**) (12.0 mg, 0.05 mmol, 0.25 equiv),  $\text{NiCl}_2 \cdot 6\text{H}_2\text{O}$  (2.4 mg, 0.01 mmol, 0.05 equiv), dtbbpy (2.7 mg, 0.01 mmol, 0.05 equiv),  $\text{K}_2\text{HPO}_4$  (69.7 mg, 0.4 mmol, 2.0 equiv) and acid chloride or acid anhydride (if solid, 0.2 mmol, 1 equiv) were taken in an oven-dried reaction-tube containing a teflon coated stirring bar and closed with a septum. Next, the tube was evacuated for 15 minutes and filled back with Argon before addition of degassed toluene or toluene derivative (6 mL) (analytical grade, degassed through a 30 min argon-purge) *via* syringe. Acid chloride or acid anhydride (if liquid, 0.2 mmol, 1.0 equiv) was added *via* syringe. The septum and the tube were sealed with parafilm and the reaction mixture was stirred under irradiation of two OSRAM CFL-lamps (warm white, 23 W). The setup was cooled with a fan

to keep the reaction temperature at ~35 °C. After 48 hours, the reaction was quenched with water (3 mL) and extracted with EtOAc (3x4 mL). The combined organic phase was filtered through MgSO<sub>4</sub> and concentrated under reduced pressure. The crude mixture was purified by flash column chromatography to obtain the desired product.

### **Characterization of ketones 3:**

#### **1,2-Diphenylethan-1-one (3a):**

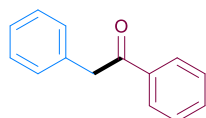

Benzoylchloride **2a** (23  $\mu$ L, 0.2 mmol, 1.0 equiv) was reacted for 48 hours according to **GP1** to give **3a** as a white solid in 93% (36.4 mg, 0.185 mmol) isolated yield after column chromatography (hexane: Et<sub>2</sub>O = 96.5:3.5;  $R_f$  = 0.38) <sup>1</sup>H NMR (600 MHz, CDCl<sub>3</sub>)  $\delta$  7.85 – 7.83 (m, 2H), 7.39 – 7.36 (m, 1H), 7.27 (t,  $J$  = 7.8 Hz, 2H), 7.15 (t,  $J$  = 7.6 Hz, 2H), 7.10 – 7.05 (m, 3H), 4.10 (s, 2H) ppm; <sup>13</sup>C NMR (151 MHz, CDCl<sub>3</sub>)  $\delta$  197.6, 136.6, 134.6, 133.2, 129.5, 128.7, 128.7, 128.6, 126.9, 45.5 ppm. The spectral data were in accordance with the literature.<sup>1</sup>

**Scale-up reaction:** 4-Benzoylphenyl acetate (**PS-5**) (60.0 mg, 0.25 mmol, 0.25 equiv), NiCl<sub>2</sub>·6H<sub>2</sub>O (11.9 mg, 0.05 mmol, 0.05 equiv), dtbbpy (13.4 mg, 0.05 mmol, 0.05 equiv) and K<sub>2</sub>HPO<sub>4</sub> (348.0 mg, 2.0 mmol, 2.0 equiv) were taken in a round-bottomed flask containing a teflon coated stirring bar and closed with a septum. Next, the flask was evacuated for 15 minutes and filled back with Argon before addition of degassed toluene ~~or toluene derivative~~ (30 mL) (analytical grade, degassed through a 30 min argon-purge) *via* syringe. Benzoylchloride (0.12 mL, 1.0 mmol, 1.0 equiv) was added *via* syringe. The septum and the tube were sealed with parafilm and the reaction mixture was stirred under irradiation of two OSRAM CFL-lamps (warm white, 23 W). The setup was cooled with a fan to keep the reaction temperature at ~35 °C. After 48 hours, the reaction was quenched with water (15 mL) and extracted with EtOAc (3x20 mL). The combined organic phase was dried over MgSO<sub>4</sub> and concentrated under reduced pressure. The crude mixture was purified by flash column chromatography (hexane: Et<sub>2</sub>O = 97:3) to give **3a** as a white solid in 87% (171.8 mg, 0.87 mmol) yield.

This compound was also obtained when benzoic anhydride **4a** (45.2 mg, 0.2 mmol, 1.0 equiv.) was reacted for 48 hours according to **GP1** in presence of **20 mol%** **PS-5** with toluene (6 mL) to give **3a** as a white solid in 75% (29.4 mg, 0.150 mmol) isolated yield after column chromatography (hexane: Et<sub>2</sub>O = 97:3).

#### **2-Phenyl-1-(*p*-tolyl)ethan-1-one (3b):**

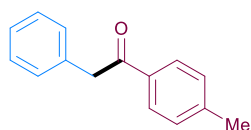

4-Methylbenzoyl chloride **2b** (26  $\mu$ L, 0.2 mmol, 1.0 equiv) was reacted for 48 hours according to **GP1** in presence of **10 mol%** **PS-5** with toluene (6 mL) to give **3b** as a white solid in 73% (30.6 mg, 0.146 mmol) isolated yield after column chromatography (pentane: Et<sub>2</sub>O = 97:3;  $R_f$  = 0.37). <sup>1</sup>H NMR (400 MHz, CDCl<sub>3</sub>)  $\delta$  7.92 (d,  $J$  = 8.0 Hz, 2H),

7.34 – 7.22 (m, 7H), 4.26 (s, 2H), 2.40 (s, 3H) ppm;  $^{13}\text{C}$  NMR (101 MHz,  $\text{CDCl}_3$ )  $\delta$  197.3, 144.0, 134.8, 134.1, 129.4, 129.3, 128.8, 128.6, 126.8, 45.4, 21.6 ppm. The spectral data were in accordance with the literature.<sup>1</sup>

### 2-Phenyl-1-(*o*-tolyl)ethan-1-one (3c):

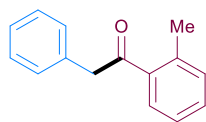

2-Methylbenzoyl chloride **2c** (26  $\mu\text{L}$ , 0.2 mmol, 1.0 equiv) was reacted for 48 hours according to **GP1** with toluene (6 mL) to give **3c** as a colorless liquid in 65% (27.3 mg, 0.130 mmol) isolated yield after column chromatography (pentane:  $\text{Et}_2\text{O}$  = 97:3;  $R_f$  = 0.4).  $^1\text{H}$  NMR (300 MHz,  $\text{CDCl}_3$ )  $\delta$  7.73-7.70 (m, 1H), 7.39-7.22 (m, 8H), 4.21 (s, 2H), 2.45 (s, 3H) ppm;  $^{13}\text{C}$  NMR (151 MHz,  $\text{CDCl}_3$ )  $\delta$  201.6, 138.7, 137.8, 134.6, 132.1, 131.5, 129.7, 128.8, 127.0, 125.8, 48.6, 21.4 ppm. The spectral data were in accordance with the literature.<sup>2</sup>

### 1-(4-Methoxyphenyl)-2-phenylethan-1-one (3d):

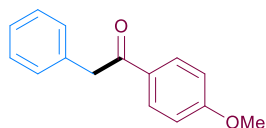

4-Methoxybenzoyl chloride **2d** (34.1 mg, 0.2 mmol, 1.0 equiv) was reacted for 48 hours according to **GP1** in presence of **25 mol%** **PS-1** to give **3d** as a white solid in 74% (33.7 mg, 0.149 mmol) isolated yield after column chromatography (hexane:  $\text{EtOAc}$  = 95: 5;  $R_f$  = 0.24).  $^1\text{H}$  NMR (600 MHz,  $\text{CDCl}_3$ )  $\delta$  8.00 (d,  $J$  = 9.2 Hz, 2H), 7.31 (d,  $J$  = 7.4 Hz, 2H), 7.26 (dd,  $J$  = 14.5, 7.4 Hz, 3H), 6.93 (d,  $J$  = 9.0 Hz, 2H), 4.23 (s, 2H), 3.85 (s, 3H) ppm;  $^{13}\text{C}$  NMR (151 MHz,  $\text{CDCl}_3$ )  $\delta$  196.2, 163.5, 135.0, 130.9, 129.7, 129.4, 128.6, 126.8, 113.8, 55.5, 45.3 ppm. The spectral data were in accordance with the literature.<sup>3</sup>

### 1-(2-Methoxyphenyl)-2-phenylethan-1-one (3e):

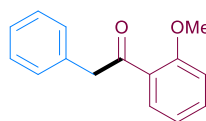

2-Methoxybenzoyl chloride **2e** (34.1 mg, 0.2 mmol, 1.0 equiv) was reacted for 48 hours according to **GP1** in presence of **25 mol%** **PS-2** with toluene (6 mL) to give **3e** as a colorless liquid in 58% (26.3 mg, 0.116 mmol) isolated yield after column chromatography (hexane:  $\text{EtOAc}$  = 95: 5;  $R_f$  = 0.35).  $^1\text{H}$  NMR (600 MHz,  $\text{CDCl}_3$ )  $\delta$  7.67 (dd,  $J$  = 7.7, 1.8 Hz, 1H), 7.45 (ddd,  $J$  = 8.6, 7.3, 1.8 Hz, 1H), 7.30 (dd,  $J$  = 8.1, 7.0 Hz, 2H), 7.23 (dt,  $J$  = 8.7, 2.8 Hz, 3H), 7.00 – 6.95 (m, 2H), 4.30 (s, 2H), 3.92 (s, 3H) ppm;  $^{13}\text{C}$  NMR (151 MHz,  $\text{CDCl}_3$ )  $\delta$  = 200.2, 158.4, 135.2, 133.5, 130.7, 129.7, 128.3, 128.3, 126.6, 120.7, 111.5, 55.5, 50.2 ppm. The spectral data were in accordance with the literature.<sup>4</sup>

### 1-Mesityl-2-phenylethan-1-one (3f):

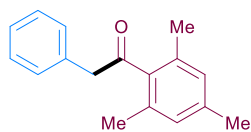

2,4,6-Trimethylbenzoyl chloride **2f** (33  $\mu\text{L}$ , 0.2 mmol, 1.0 equiv) was reacted for 48 hours according to **GP1** with toluene (6 mL) to give **3f** as a white solid in 48% (23.1 mg, 0.097 mmol) isolated yield after column chromatography (pentane:  $\text{Et}_2\text{O}$  = 97:3;

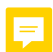

$R_f = 0.6$ .  $^1\text{H NMR}$  (300 MHz  $\text{CDCl}_3$ )  $\delta$  7.35-7.26 (m, 3H), 7.22 (d,  $J = 7.0$  Hz, 2H), 6.83 (s, 2H), 4.01 (s, 2H), 2.29 (s, 3H), 2.14 (s, 6H) ppm;  $^{13}\text{C NMR}$  (151 MHz,  $\text{CDCl}_3$ )  $\delta$  207.7, 139.3, 138.7, 133.4, 132.9, 130.0, 128.7, 128.6, 127.2, 51.9, 21.2, 19.3 ppm. The spectral data were in accordance with the literature.<sup>4</sup>

#### 1-(3-fluorophenyl)-2-phenylethan-1-one (**3g**):

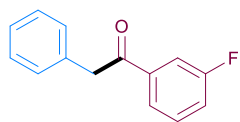

3-Fluorobenzoyl chloride **2g** (24.3  $\mu\text{L}$ , 0.2 mmol, 1.0 equiv) was reacted for 48 hours according to **GP1** with toluene (6 mL) to give **3g** as a white solid in 60% (25.7 mg, 0.12 mmol) isolated yield after column chromatography (hexane:  $\text{Et}_2\text{O} = 97:3$ ;  $R_f = 0.37$ ).  $^1\text{H NMR}$  (600 MHz,  $\text{CDCl}_3$ )  $\delta$  7.82 (d,  $J = 7.7$  Hz, 1H), 7.71 (dt,  $J = 9.4, 2.1$  Hz, 1H), 7.46 (td,  $J = 8.0, 5.5$  Hz, 1H), 7.36 (dd,  $J = 8.6, 6.6$  Hz, 2H), 7.31 – 7.27 (m, 4H), 4.29 (s, 2H) ppm;  $^{13}\text{C NMR}$  (151 MHz,  $\text{CDCl}_3$ )  $\delta$  196.3, 162.9 (d,  $J = 247.2$  Hz), 138.7 (d,  $J = 6.1$  Hz), 134.1, 130.3 (d,  $J = 7.3$  Hz), 129.4, 128.8, 127.1, 124.4, 120.2 (d,  $J = 21.8$  Hz), 115.3 (d,  $J = 21.9$  Hz), 45.7 ppm;  $^{19}\text{F NMR}$  (565 MHz,  $\text{CDCl}_3$ )  $\delta$  -111.7 (dd,  $J = 15.3, 7.2$  Hz) ppm. The spectral data were in accordance with the literature.<sup>5</sup>

#### 1-(4-chlorophenyl)-2-phenylethan-1-one (**3h**):

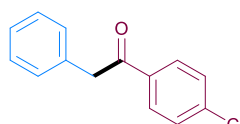

4-Chlorobenzoyl chloride **2h** (25.6  $\mu\text{L}$ , 0.2 mmol, 1.0 equiv) was reacted for 24 hours according to **GP1** with toluene (6 mL) to give **3h** as a white solid in 60% (27.6 mg, 0.12 mmol) isolated yield after column chromatography (pentane:  $\text{Et}_2\text{O} = 98:2$ ;  $R_f = 0.33$ ).  $^1\text{H NMR}$  (600 MHz,  $\text{CDCl}_3$ )  $\delta$  7.93 (d,  $J = 8.9$  Hz, 2H), 7.41 (d,  $J = 8.3$  Hz, 2H), 7.32 (t,  $J = 7.7$  Hz, 2H), 7.26-7.23 (m, 3H), 4.24 (s, 2H) ppm;  $^{13}\text{C NMR}$  (151 MHz,  $\text{CDCl}_3$ )  $\delta$  196.5, 139.7, 135.0, 134.3, 130.2, 129.5, 129.1, 128.9, 127.2, 45.7 ppm. The spectral data were in accordance with the literature.<sup>6</sup>

#### 1,3-Diphenylpropan-2-one (**3i**):

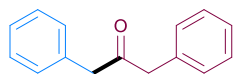

2-Phenylacetyl chloride **2i** (26  $\mu\text{L}$ , 0.2 mmol, 1.0 equiv) was reacted for 48 hours according to **GP1** with toluene (6 mL) to give **3i** as a colorless liquid in 70% (29.3 mg, 0.139 mmol) isolated yield after column chromatography (pentane:  $\text{Et}_2\text{O} = 97:3$ ;  $R_f = 0.4$ ).  $^1\text{H NMR}$  (400 MHz,  $\text{CDCl}_3$ )  $\delta$  7.38-7.28 (m, 6H), 7.20-7.18 (m, 4H), 3.76 (s, 4H) ppm.  $^{13}\text{C NMR}$  (101 MHz,  $\text{CDCl}_3$ )  $\delta$  = 205.8, 134.1, 129.6, 128.8, 127.2, 49.2 ppm. The spectral data were in accordance with the literature.<sup>7</sup>

#### 1,4-Diphenylbutan-2-one (**3j**):

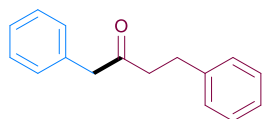

Hydrocinnamoyl chloride **2j** (30  $\mu\text{L}$ , 0.2 mmol, 1.0 equiv) was reacted for 48 hours according to **GP1** with toluene (6 mL) to give **3j** as a colorless liquid in 68% (30.7 mg, 0.137 mmol) isolated yield after column chromatography (pentane:  $\text{Et}_2\text{O} = 96:4$ ;  $R_f = 0.4$ ).  $^1\text{H NMR}$  (400 MHz,  $\text{CDCl}_3$ )  $\delta$  7.35-7.25 (m, 5H), 7.21-7.13 (m, 5H), 3.67 (s, 2H), 2.90-

2.85 (m, 2H), 2.80-2.76 (m, 2H) ppm;  $^{13}\text{C}$  NMR (101 MHz,  $\text{CDCl}_3$ )  $\delta$  207.5, 141.0, 134.2, 129.5, 128.9, 128.6, 128.4, 127.1, 126.2, 50.5, 43.6, 29.9 ppm. The spectral data were in accordance with the literature.<sup>3</sup>

### 1-Cyclohexyl-2-phenylethan-1-one (3k):

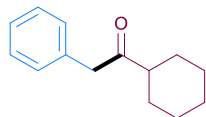

Cyclohexanecarbonyl chloride **2k** (27  $\mu\text{L}$ , 0.2 mmol, 1.0 equiv) was reacted for 48 hours according to **GP1** with toluene (6 mL) to give **3k** as a colorless liquid in 59% (23.9 mg, 0.118 mmol) isolated yield after column chromatography (pentane:  $\text{Et}_2\text{O}$  = 97:3;  $R_f$  = 0.43).  $^1\text{H}$  NMR (300 MHz,  $\text{CDCl}_3$ )  $\delta$  7.26-7.09 (m, 5H), 3.64 (s, 2H), 2.37 (tt,  $J$  = 11.4, 3.3 Hz, 1H), 1.77-1.53 (m, 5H), 1.35-1.07 (m, 5H) ppm;  $^{13}\text{C}$  NMR (75 MHz,  $\text{CDCl}_3$ )  $\delta$  211.3, 134.6, 129.6, 128.7, 126.9, 50.2, 48.0, 28.7, 25.9, 25.7 ppm. The spectral data were in accordance with the literature.<sup>8</sup>

### 1-Phenylnonan-2-one (3l):

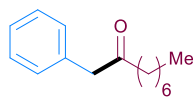

Octanoyl chloride **2l** (34  $\mu\text{L}$ , 0.2 mmol, 1.0 equiv) was reacted for 48 hours according to **GP1** with toluene (6 mL) to give **3l** as a colorless liquid in 72% (31.4 mg, 0.144 mmol) isolated yield after column chromatography (pentane:  $\text{Et}_2\text{O}$  = 98:2;  $R_f$  = 0.47).  $^1\text{H}$  NMR (400 MHz,  $\text{CDCl}_3$ )  $\delta$  7.34-7.30 (m, 2H), 7.27-7.24 (m, 1H), 7.21-7.19 (m, 2H), 3.67 (s, 2H), 2.43 (t,  $J$  = 7.4 Hz, 2H), 1.54 (p,  $J$  = 7.1 Hz, 2H), 1.31 – 1.16 (m, 8H), 0.86 (t,  $J$  = 6.8 Hz, 3H) ppm;  $^{13}\text{C}$  NMR (101 MHz,  $\text{CDCl}_3$ )  $\delta$  208.7, 134.5, 129.5, 128.8, 127.1, 50.3, 42.1, 31.8, 29.2, 29.1, 23.9, 22.7, 14.2 ppm. The spectral data were in accordance with the literature.<sup>7</sup>

### 1-Phenylundecan-2-one (3m):

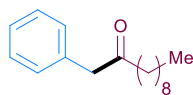

Decanoyl chloride **2m** (42  $\mu\text{L}$ , 0.2 mmol, 1.0 equiv.) was reacted for 48 hours according to **GP1** with toluene (6 mL) to give **3m** as a colorless liquid in 57% (28.0 mg, 0.114 mmol) isolated yield after column chromatography (pentane:  $\text{Et}_2\text{O}$  = 98:2;  $R_f$  = 0.47).  $^1\text{H}$  NMR (400 MHz,  $\text{CDCl}_3$ )  $\delta$  7.34-7.30 (m, 2H), 7.27-7.23 (m, 1H), 7.21-7.19 (m, 2H), 3.67 (s, 2H), 2.43 (t,  $J$  = 7.4 Hz, 2H), 1.59-1.50 (m, 2H), 1.30 – 1.22 (m, 12H), 0.87 (t,  $J$  = 6.8 Hz, 3H) ppm;  $^{13}\text{C}$  NMR (101 MHz,  $\text{CDCl}_3$ )  $\delta$  = 208.8, 134.5, 129.5, 128.8, 127.1, 50.3, 42.1, 32.0, 29.5, 29.5, 29.4, 29.2, 23.9, 22.8, 14.2 ppm. The spectral data were in accordance with the literature.<sup>9</sup>

### 1-Phenyldodec-11-en-2-one (3n):

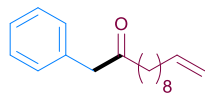

Undec-10-enoyl chloride **2n** (43  $\mu\text{L}$ , 0.2 mmol, 1.0 equiv) was reacted for 48 hours according to **GP1** with toluene (6 mL) to give **3n** as a colorless liquid in 47% (24.3 mg, 0.094 mmol) isolated yield after column chromatography (pentane:  $\text{Et}_2\text{O}$  = 96:4;  $R_f$  = 0.5).  $^1\text{H}$  NMR (600 MHz,  $\text{CDCl}_3$ )  $\delta$  7.35 (t,  $J$  = 7.5 Hz, 2H), 7.30 – 7.27 (m, 1H), 7.24 – 7.22 (m, 2H), 5.83 (ddt,  $J$  = 16.9, 10.2, 6.6 Hz, 1H), 5.01 (dq,  $J$  = 17.1, 1.8 Hz, 1H), 4.96 – 4.94 (m, 1H), 3.70 (s, 2H), 2.46 (t,



$J = 7.4$  Hz, 2H), 2.05 (q,  $J = 7.1$  Hz, 2H), 1.57 (p,  $J = 7.6$  Hz, 2H), 1.38 (p,  $J = 7.2$  Hz, 2H), 1.30 – 1.23 (m, 8H) ppm;  $^{13}\text{C}$  NMR (151 MHz,  $\text{CDCl}_3$ )  $\delta$  208.6, 139.2, 134.4, 129.4, 128.7, 127.0, 114.1, 50.2, 42.0, 33.8, 29.3, 29.3, 29.1, 29.0, 28.9, 23.7 ppm; IR (ATR):  $\tilde{\nu} = 3418, 3070, 3030, 2925, 2854, 2662, 2328, 2094, 1712, 1639, 1495, 1454, 1411, 1362, 1184, 993, 909, 700\text{ cm}^{-1}$ ; HRMS (ESI): calc. for  $\text{C}_{18}\text{H}_{26}\text{ONa}$ : 281.18759; found: 281.18748.

#### 1-phenyl-2-(*p*-tolyl)ethan-1-one (**3o**):

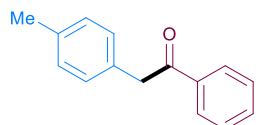

Benzoylchloride **2a** (23  $\mu\text{L}$ , 0.2 mmol, 1.0 equiv.) was reacted for 48 hours according to **GP1** with *p*-xylene (6 mL) to give **3o** as a white solid in 79% (33.4 mg, 0.159 mmol) isolated yield after column chromatography (hexane: EtOAc = 96:4;  $R_f = 0.5$ ).  $^1\text{H}$  NMR (600 MHz,  $\text{CDCl}_3$ )  $\delta$  8.02 (dd,  $J = 8.0, 1.5$  Hz, 2H), 7.57 – 7.54 (m, 1H), 7.46 (t,  $J = 7.7$  Hz, 2H), 7.16 (q,  $J = 7.9$  Hz, 4H), 4.25 (s, 2H), 2.33 (s, 3H) ppm;  $^{13}\text{C}$  NMR (151 MHz,  $\text{CDCl}_3$ )  $\delta$  197.8, 136.7, 136.5, 133.1, 131.5, 129.4, 129.3, 128.6, 45.2, 21.1 ppm. The spectral data were in accordance with the literature.<sup>10</sup>

#### 1-Phenyl-2-(*m*-tolyl)ethan-1-one (**3p**):

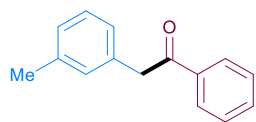

Benzoylchloride **2a** (23  $\mu\text{L}$ , 0.2 mmol, 1.0 equiv.) was reacted for 48 hours according to **GP1** with *m*-xylene (6 mL) to give **3p** as a yellow oil in 73% (30.6 mg, 0.146 mmol) isolated yield after column chromatography (hexane: EtOAc = 96:4;  $R_f = 0.55$ ).  $^1\text{H}$  NMR (600 MHz,  $\text{CDCl}_3$ )  $\delta$  8.04 – 8.02 (m, 2H), 7.67 – 7.54 (m, 1H), 7.46 (t,  $J = 7.7$  Hz, 2H), 7.22 (t,  $J = 7.6$  Hz, 1H), 7.10 (s, 1H), 7.08 (dd,  $J = 7.4, 3.6$  Hz, 2H), 4.26 (s, 2H), 2.34 (s, 3H) ppm;  $^{13}\text{C}$  NMR (151 MHz,  $\text{CDCl}_3$ )  $\delta$  197.8, 138.3, 136.7, 134.5, 133.1, 130.2, 128.7, 128.6, 127.7, 126.5, 45.5, 21.4 ppm. The spectral data were in accordance with the literature.<sup>4</sup>

#### 4-(2-oxo-2-phenylethyl)phenyl acetate (**3r**):

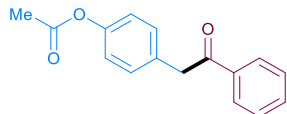

Benzoylchloride **2a** (23  $\mu\text{L}$ , 0.2 mmol, 1.0 equiv.) was reacted for 48 hours according to **GP1** with *p*-tolyl acetate (6 mL) to give **3r** as a white solid in 39% (20.2 mg, 0.079 mmol) isolated yield after column chromatography [hexane: EtOAc = 95:5 ( $R_f = 0.25$ )  $\rightarrow$  90:10 ( $R_f = 0.46$ )].  $^1\text{H}$  NMR (400 MHz,  $\text{CDCl}_3$ )  $\delta$  8.02 – 8.00 (m, 2H), 7.59 – 7.55 (m, 1H), 7.47 (t,  $J = 7.6$  Hz, 2H), 7.28 (d,  $J = 8.5$  Hz, 2H), 7.05 (d,  $J = 8.6$  Hz, 2H), 4.28 (s, 2H), 2.28 (s, 3H) ppm;  $^{13}\text{C}$  NMR (101 MHz,  $\text{CDCl}_3$ )  $\delta$  197.4, 169.6, 149.8, 136.7, 133.4, 132.2, 130.6, 128.8, 128.7, 121.9, 44.8, 21.3 ppm. The spectral data were in accordance with the literature.<sup>11</sup>

### 2-(4-Chlorophenyl)-1-phenylethan-1-one (3s):

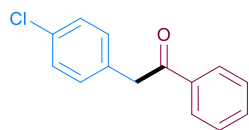

Benzoylchloride **2a** (23  $\mu$ L, 0.2 mmol, 1.0 equiv.) was reacted for 48 hours according to **GP1** with 4-chlorotoluene (6 mL) to give **3s** as a white solid in 85% (39.4 mg, 0.171 mmol) isolated yield after column chromatography (hexane: Et<sub>2</sub>O = 96:4;  $R_f$  = 0.44). **<sup>1</sup>H NMR** (600 MHz, CDCl<sub>3</sub>)  $\delta$  8.01 – 7.99 (m, 2H), 7.59 – 7.56 (m, 1H), 7.47 (t,  $J$  = 7.8 Hz, 2H), 7.31 – 7.29 (m, 2H), 7.21 – 7.19 (m, 2H), 4.26 (s, 2H) ppm; **<sup>13</sup>C NMR** (151 MHz, CDCl<sub>3</sub>)  $\delta$  = 197.1, 136.4, 133.4, 133.0, 132.9, 130.9, 128.8, 128.7, 128.5, 44.7 ppm. The spectral data were in accordance with the literature.<sup>1</sup>

### 2-(4-Methoxyphenyl)-1-phenylethan-1-one (3t):

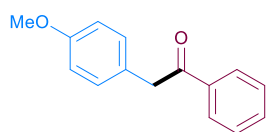

Benzoylchloride **2a** (23  $\mu$ L, 0.2 mmol, 1.0 equiv.) was reacted for 48 hours according to **GP1** in 1-methoxy-4-methylbenzene (6 mL) to give **3t** as a white solid in 56% (25.5 mg, 0.113 mmol) isolated yield after column chromatography (hexane: EtOAc = 95:5;  $R_f$  = 0.3). **<sup>1</sup>H NMR** (600 MHz, CDCl<sub>3</sub>)  $\delta$  8.01 (dd,  $J$  = 8.1, 1.5 Hz, 2H), 7.57 – 7.54 (m, 1H), 7.46 (t,  $J$  = 7.8 Hz, 2H), 7.20 – 7.18 (m, 2H), 6.88 – 6.86 (m, 2H), 4.23 (s, 2H), 3.79 (s, 3H) ppm; **<sup>13</sup>C NMR** (151 MHz, CDCl<sub>3</sub>)  $\delta$  197.9, 158.6, 136.7, 133.1, 130.5, 128.6, 128.6, 126.5, 114.2, 55.3, 44.6 ppm. The spectral data were in accordance with the literature.<sup>1</sup>

### 2-(3,5-dimethylphenyl)-1-phenylethan-1-one (3u):

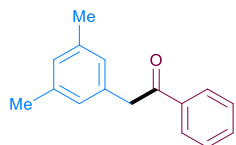

Benzoylchloride **2a** (23  $\mu$ L, 0.2 mmol, 1.0 equiv.) was reacted for 48 hours according to **GP1** with mesitylene (6 mL) to give **3u** as a colorless oil in 38% (17.2 mg, 0.077 mmol) isolated yield after column chromatography (hexane: EtOAc = 96:4;  $R_f$  = 0.5). **<sup>1</sup>H NMR** (600 MHz, CDCl<sub>3</sub>)  $\delta$  8.03 – 8.01 (m, 2H), 7.57 – 7.54 (m, 1H), 7.46 (t,  $J$  = 7.8 Hz, 2H), 6.89 (s, 3H), 4.21 (s, 2H), 2.29 (s, 6H) ppm; **<sup>13</sup>C NMR** (151 MHz, CDCl<sub>3</sub>)  $\delta$  197.9, 138.2, 136.7, 134.3, 133.1, 128.7, 128.6, 127.2, 45.4, 21.3 ppm. The spectral data were in accordance with the literature.<sup>Fehler! Textmarke nicht definiert.</sup>

### 1-(4-fluorophenyl)-2-phenylethan-1-one (3v):

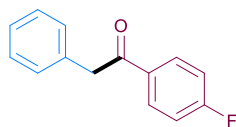

4-Fluorobenzoic anhydride (52.4 mg, 0.2 mmol, 1.0 equiv.) was reacted for 48 hours according to **GP1** with toluene (6 mL) to give **3v** as a white solid in 44% (19.0 mg, 0.089 mmol) isolated yield after column chromatography (hexane: Et<sub>2</sub>O = 96.5:3.5;  $R_f$  = 0.38). **<sup>1</sup>H NMR** (600 MHz, CDCl<sub>3</sub>)  $\delta$  8.04 (dd,  $J$  = 8.3, 5.4 Hz, 2H), 7.35 – 7.32 (m, 2H), 7.28 – 7.26 (m, 3H), 7.14 – 7.11 (m, 2H), 4.26 (s, 2H) ppm; **<sup>13</sup>C NMR** (151 MHz, CDCl<sub>3</sub>)  $\delta$  = 196.1, 165.8 (d,  $J$  = 254.7 Hz), 134.3, 133.0 (d,  $J$  = 3.6 Hz), 131.3 (d,  $J$  = 9.7 Hz), 129.4, 128.7, 127.0, 115.8 (d,  $J$  = 22.2 Hz),

45.5 ppm;  $^{19}\text{F}$  NMR (564 MHz,  $\text{CDCl}_3$ )  $\delta$  = -105.02 (ddd,  $J$  = 13.3, 8.1, 5.1 Hz) ppm. The spectral data were in accordance with the literature.<sup>12</sup>

### 1-Phenylheptan-2-one (3w):

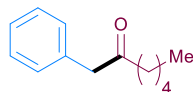

Caproic anhydride (46  $\mu\text{L}$ , 0.2 mmol, 1.0 equiv.) was reacted for 48 hours according to **GP1** in presence of **20 mol%** **PS-5** with toluene (6 mL) to give **3w** as a colorless liquid in 61% (23.2 mg, 0.122 mmol) isolated yield after column chromatography (hexane:  $\text{Et}_2\text{O}$  = 97:3;  $R_f$  = 0.48).  $^1\text{H}$  NMR (600 MHz,  $\text{CDCl}_3$ )  $\delta$  7.35 (t,  $J$  = 7.5 Hz, 2H), 7.30 – 7.27 (m, 1H), 7.24 – 7.22 (m, 2H), 3.70 (s, 2H), 2.46 (t,  $J$  = 7.4 Hz, 2H), 1.58 (p,  $J$  = 7.4 Hz, 2H), 1.33 – 1.21 (m, 4H), 0.88 (t,  $J$  = 7.2 Hz, 3H) ppm;  $^{13}\text{C}$  NMR (151 MHz,  $\text{CDCl}_3$ )  $\delta$  = 208.6, 134.4, 129.4, 128.7, 127.0, 50.2, 42.0, 31.3, 23.4, 22.4, 13.9 ppm. The spectral data were in accordance with the literature.<sup>13</sup>

### 3,3-Dimethyl-1-phenylbutan-2-one (3x):

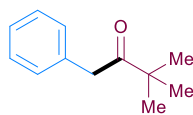

Pivalic anhydride (41  $\mu\text{L}$ , 0.2 mmol, 1.0 equiv.) was reacted for 48 hours according to **GP1** with toluene (6 mL) to give **3x** as a colorless liquid in 44% (15.5 mg, 0.088 mmol) isolated yield after column chromatography (hexane:  $\text{Et}_2\text{O}$  = 97:3;  $R_f$  = 0.5).  $^1\text{H}$  NMR (600 MHz,  $\text{CDCl}_3$ )  $\delta$  7.34 = (t,  $J$  = 7.5 Hz, 2H), 7.28 – 7.25 (m, 1H), 7.21 – 7.20 (m, 2H), 3.83 (s, 2H), 1.23 (s, 9H);  $^{13}\text{C}$  NMR (151 MHz,  $\text{CDCl}_3$ )  $\delta$  212.8, 135.0, 129.6, 128.4, 126.6, 44.7, 43.3, 26.4 ppm. The spectral data were in accordance with the literature.<sup>14</sup>

### Preparation of 4-benzoylphenyl acetate (**PS-5**)<sup>15</sup>:

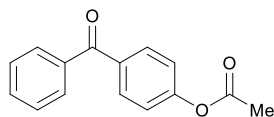

According to a literature procedure, 4-hydroxybenzophenone (238.0 mg, 1.2 mmol), acetyl chloride (128  $\mu\text{L}$ , 1.8 mmol) and triethylamine (336  $\mu\text{L}$ , 2.4 mmol) were stirred in dichloromethane (20 mL) at 60 °C for 15 hours. After cooling to ambient temperature, the mixture was washed with water and the aqueous phase extracted with DCM (2 x 10 mL). The combined organic phase was filtered over  $\text{MgSO}_4$  and concentrated under reduced pressure. The crude mixture was purified by flash column chromatography (hexane:  $\text{EtOAc}$  = 5:1;  $R_f$  = 0.52) to give **PS-5** as a white solid in 79% (227 mg, 0.944 mmol).  $^1\text{H}$  NMR (400 MHz,  $\text{CDCl}_3$ )  $\delta$  7.86 (d,  $J$  = 8.5 Hz, 2H), 7.81 – 7.79 (m, 2H), 7.60 (t,  $J$  = 7.4 Hz, 1H), 7.49 (t,  $J$  = 7.6 Hz, 2H), 7.22 (d,  $J$  = 8.5 Hz, 2H), 2.34 (s, 3H) ppm;  $^{13}\text{C}$  NMR (151 MHz,  $\text{CDCl}_3$ )  $\delta$  = 195.7, 169.1, 154.0, 137.6, 135.2, 132.6, 131.8, 130.1, 128.5, 121.7, 21.3 ppm. The spectral data were in accordance with the literature.<sup>15</sup>

### Preparation of 4-Acetoxy. 4-chlorobenzophenone (**PS-4**)<sup>15</sup>:

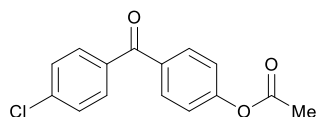

According to the literature procedure 4-hydroxy.4-chlorobenzophenone (280.0 mg, 1.2 mmol), acetyl chloride (128  $\mu\text{L}$ , 1.8 mmol) and triethylamine

(336  $\mu$ L, 2.4 mmol) were stirred in dichloromethane (20 mL) at 60  $^{\circ}$ C for 15 hours. After cooling to ambient temperature, the mixture was washed with water and the aqueous phase extracted with DCM (2 x 10 mL). The combined organic phase was filtered over  $\text{MgSO}_4$  and concentrated under reduced pressure. The crude mixture was purified by flash column chromatography (hexane: EtOAc = 5:1;  $R_f$  = 0.55) to give **PS-4** as a white solid in 78% (256 mg, 0.932 mmol).  **$^1\text{H}$  NMR** (600 MHz,  $\text{CDCl}_3$ )  $\delta$  7.83 -7.81 (m, 2H), 7.75 (d,  $J$  = 8.4 Hz, 2H), 7.48-7.46 (m, 2H), 7.23 (d,  $J$  = 9.0 Hz, 2H), 2.35 (s, 3H) ppm;  **$^{13}\text{C}$  NMR** (151 MHz,  $\text{CDCl}_3$ )  $\delta$  = 194.4, 169.0, 154.2, 139.1, 135.9, 134.9, 131.7, 131.5, 128.9, 121.8, 21.3 ppm. The spectral data were in accordance with the literature.<sup>16</sup>

## Reaction with Ethylbenzene:

Scheme S1:

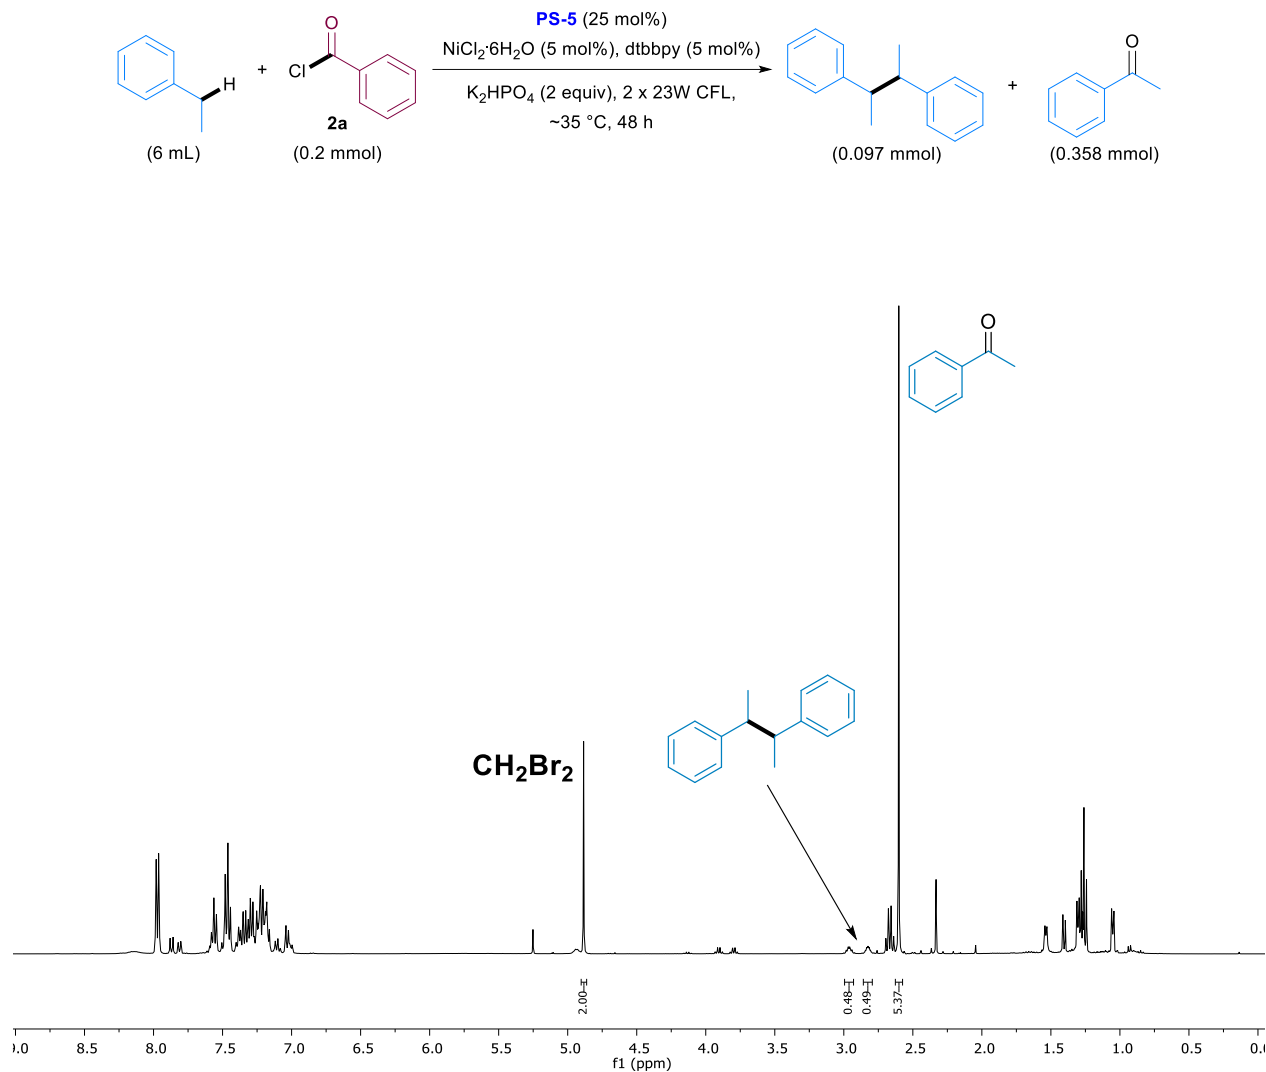

## **References:**

---

1. J.-W. Yu, S. Mao, Y.-Q. Wang, *Tetrahedron Lett.*, 2015, **56**, 1575.
2. L. Huang, G. Li, W-P. Huang, D.-G. Yu, Z-J. Shi, *Chem. Commun.*, 2011, **47**, 7224.
3. L. Buzzetti, A. Prieto, S. Raha Roy, P. Melchiorre, *Angew. Chem., Int. Ed.*, 2017, **56**, 15039.
4. X. Chen, Z. Chen, C. M. So, *J. Org. Chem.*, 2019, **84**, 6337–6346.
5. Y.-C. Wong, K. Parthasarathy, C.-H. Cheng, *Org. Lett.*, 2010, **12**, 1736.
6. Z-L. Shen, X-P. Xu, S-J. Ji, *J. Org. Chem.* 2010, **75**, 1162.
7. S.-I. Inaba; R. D. Rieke, *J. Org. Chem.*, 1985, **50**, 1373.
8. A. H. Stoll, A. Krasovskiy, P. Knochel, *Angew. Chem., Int. Ed.*, 2006, **45**, 606.
9. R. L. Zhai, Y. S. Xue, T. Liang, J. J. Mi, Z. Xu, *J. Org. Chem.*, 2018, **83**, 10051.
10. B. Landers, C. Berini, C. Wang and O. Navarro, *J. Org. Chem.*, 2011, **76**, 1390.
11. Y. S. Suh, J-s. Lee, S-H. Kim, R. D. Rieke, *J. Organomet. Chem.*, 2003, **684**, 20-36.
12. B. Zhao, X. Lu, *Org. Lett.*, 2006, **8**, 5987.
13. G. Zhang, X. Hu, C. – W. Chiang, H. Yi, P. Pei, A. K. Singh, A. Lei, *J. Am. Chem. Soc.* 2016, **138**, 12037.
14. K. Nozawa-Kumada, S. Ito, K. Noguchi, M. Shigeno, Y. Kondo, *Chem. Commun.*, 2019, **55**, 12968.
15. M. Tomasulo, S. L. Kaanumal, S. Sortino, F. M. Raymo, *J. Org. Chem.*, 2007, **72**, 595.
16. I. Vaya, I. Andreu, V. T. Monje, M. C. Jiménez, M. A. Miranda, *Chem. Res. Toxicol.*, 2016, **29**, 40.

# NMR spectra:

<sup>1</sup>H-NMR (3a) [600 MHz, CDCl<sub>3</sub>]

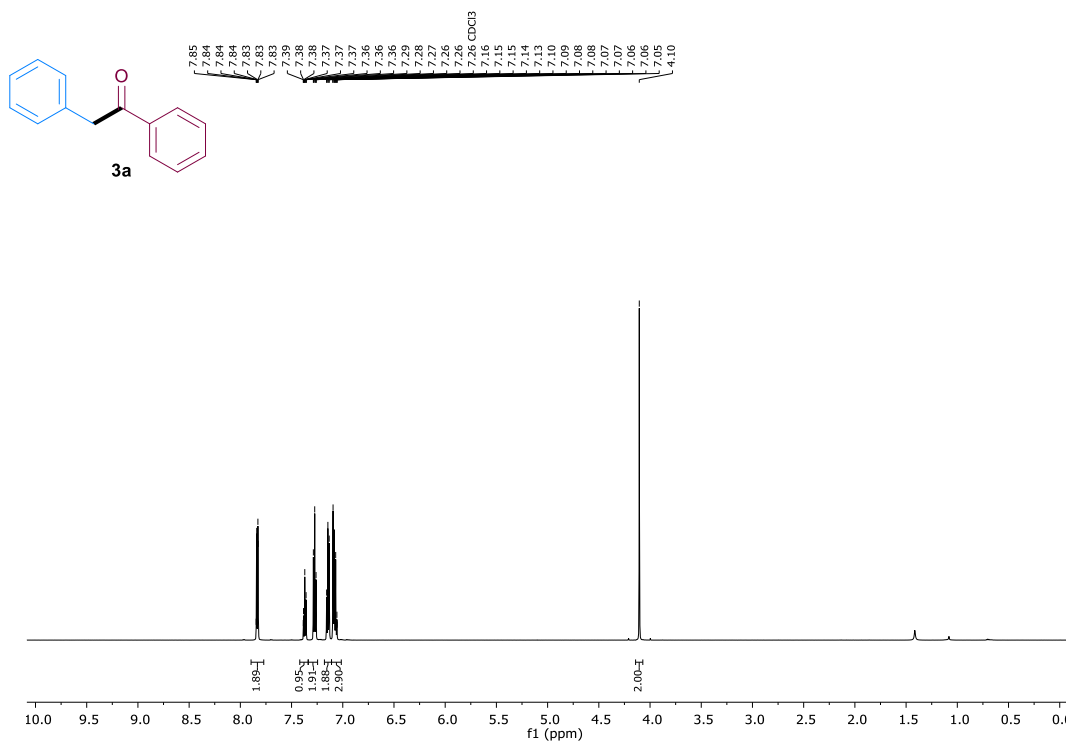

<sup>13</sup>C-NMR (3a) [151 MHz, CDCl<sub>3</sub>]

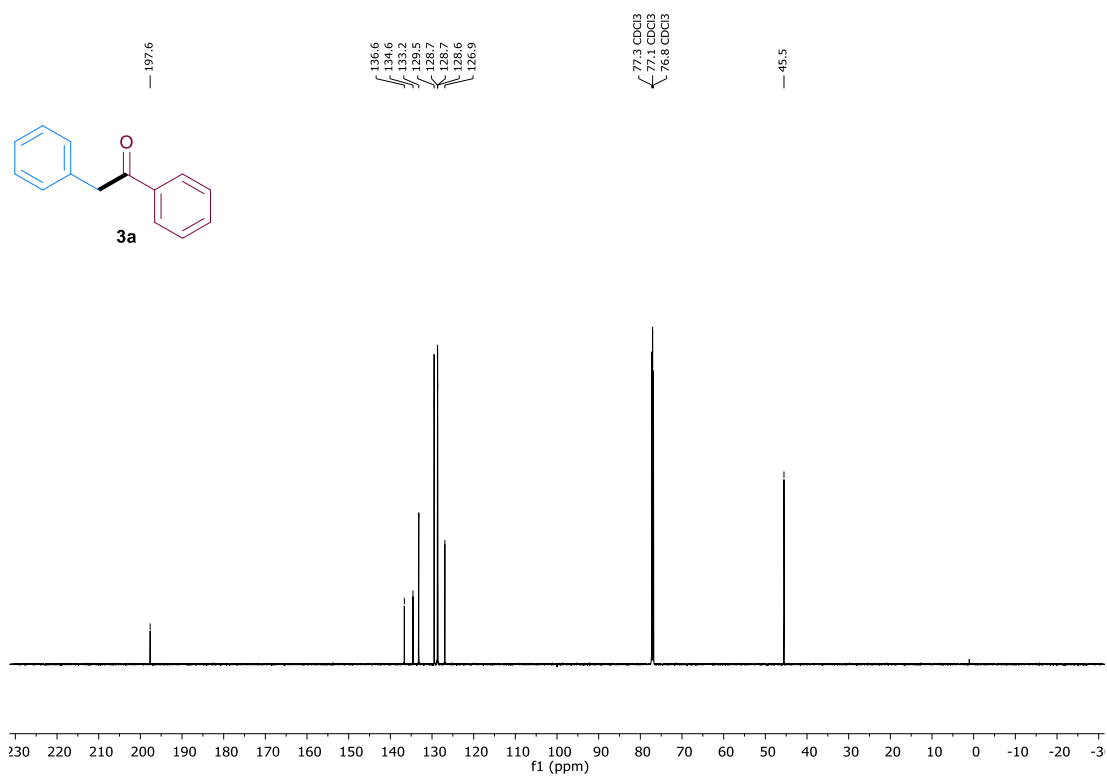

**<sup>1</sup>H-NMR (3b) [400 MHz, CDCl<sub>3</sub>]**

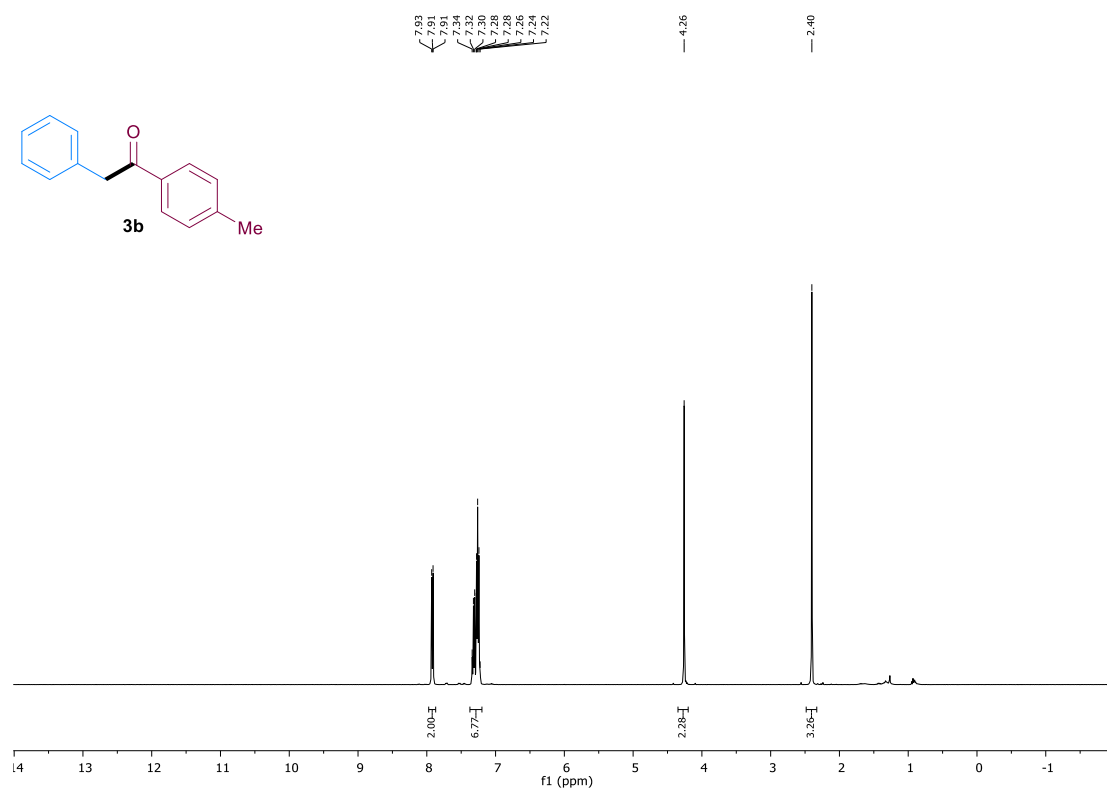

**<sup>13</sup>C-NMR (3b) [101 MHz, CDCl<sub>3</sub>]**

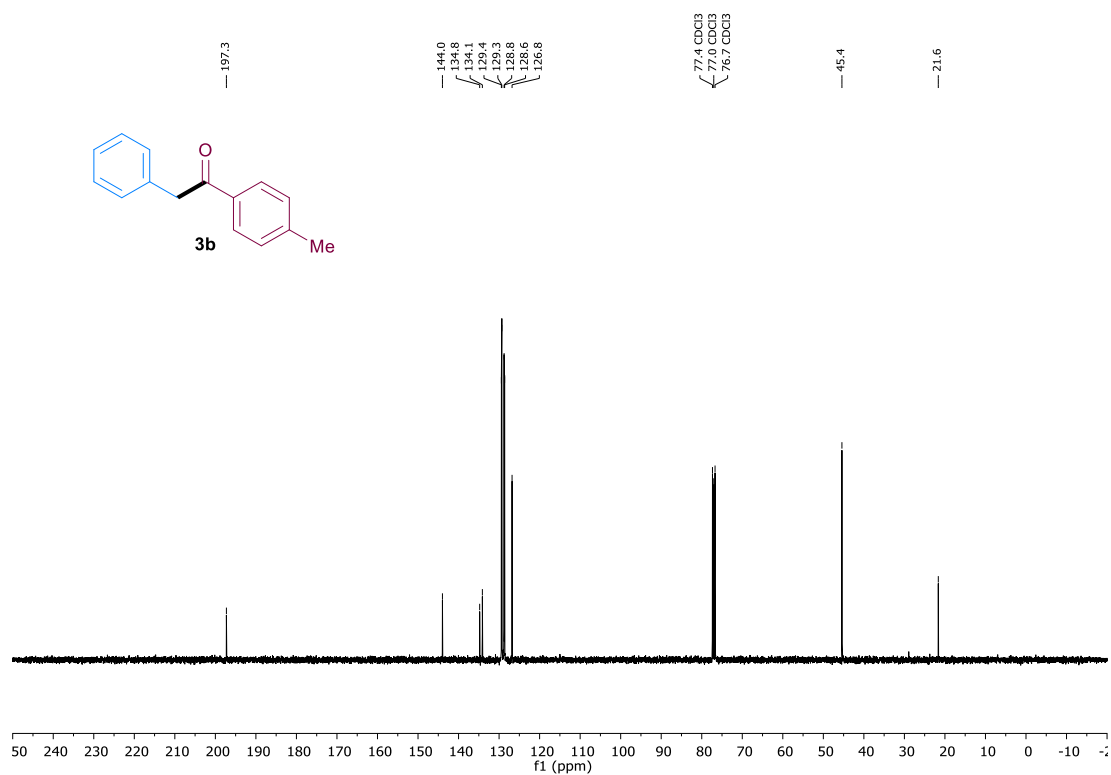

**<sup>1</sup>H-NMR (3c) [300 MHz, CDCl<sub>3</sub>]**

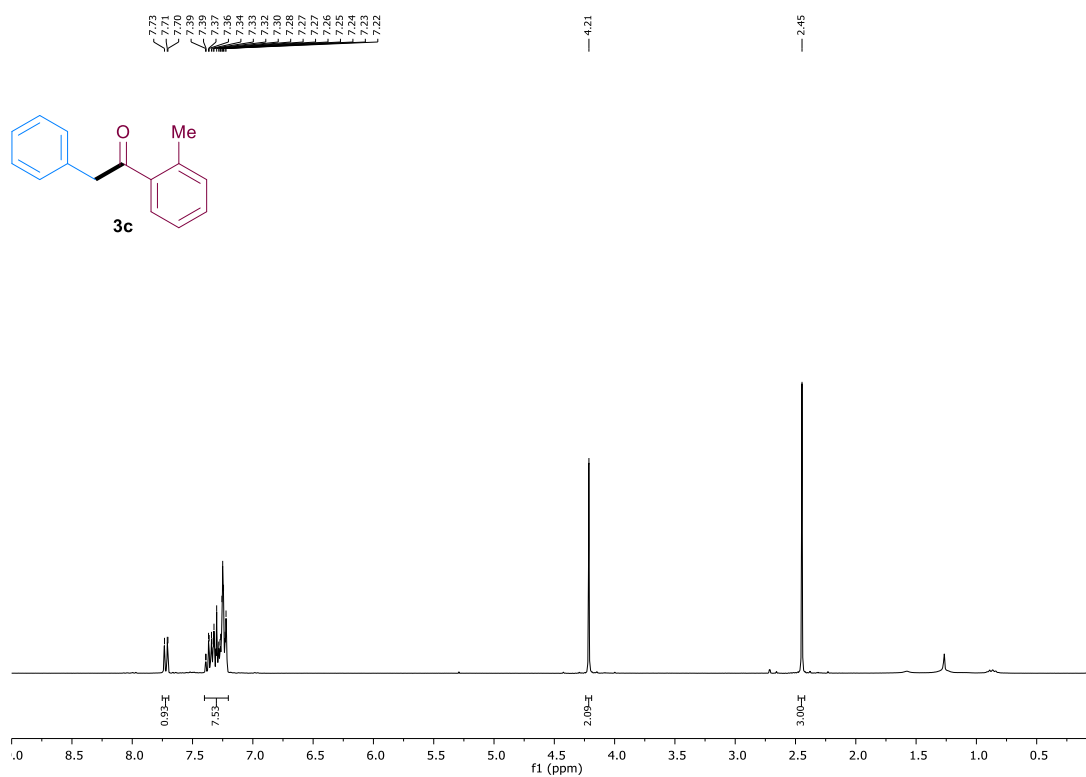

**<sup>13</sup>C-NMR (3c) [151 MHz, CDCl<sub>3</sub>]**

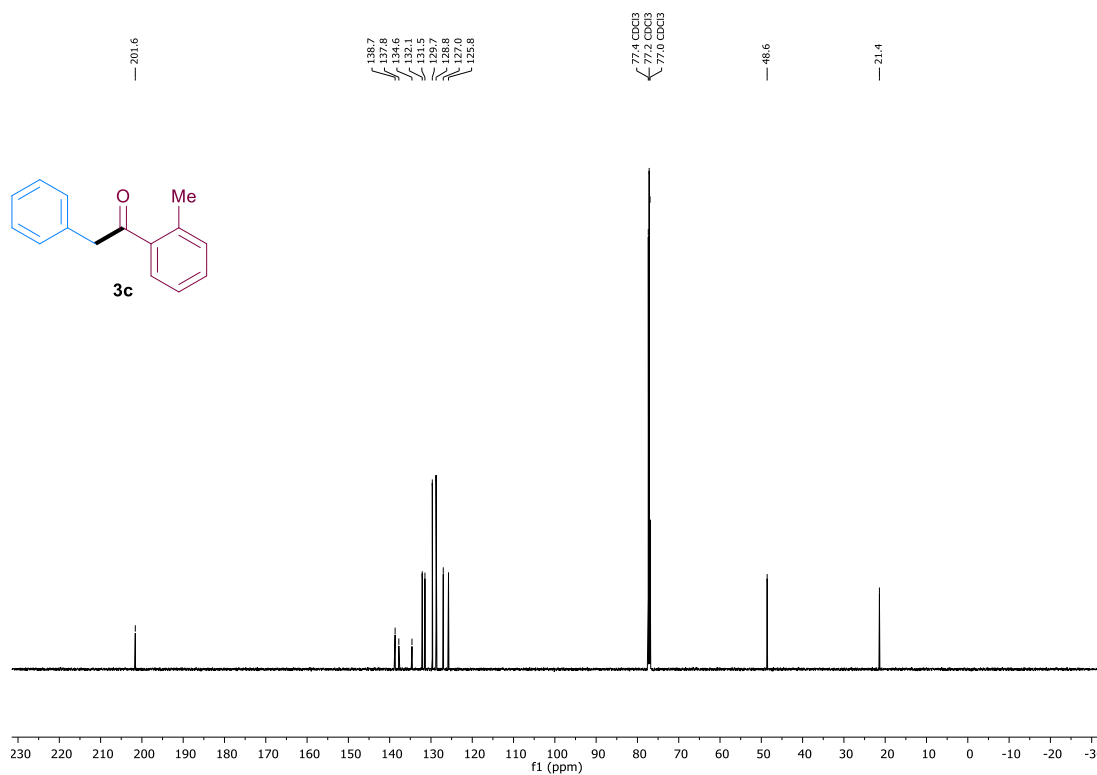



**<sup>1</sup>H-NMR (3d) [600 MHz, CDCl<sub>3</sub>]**

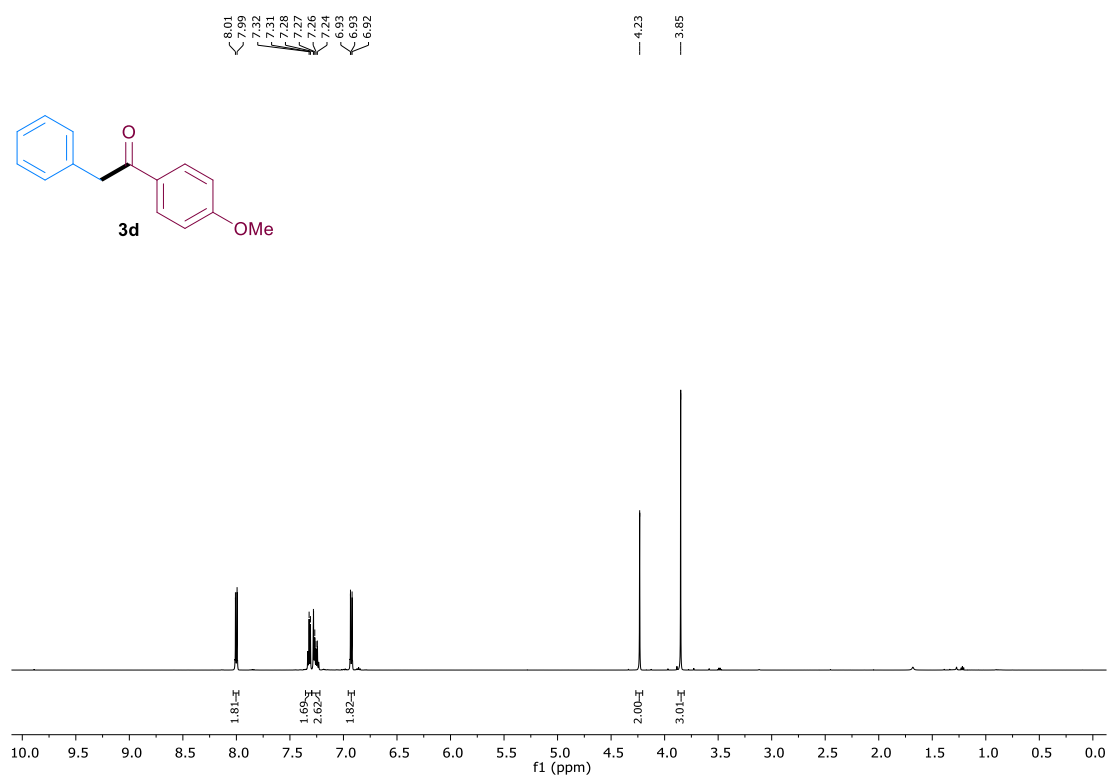

**<sup>13</sup>C-NMR (3d) [151 MHz, CDCl<sub>3</sub>]**

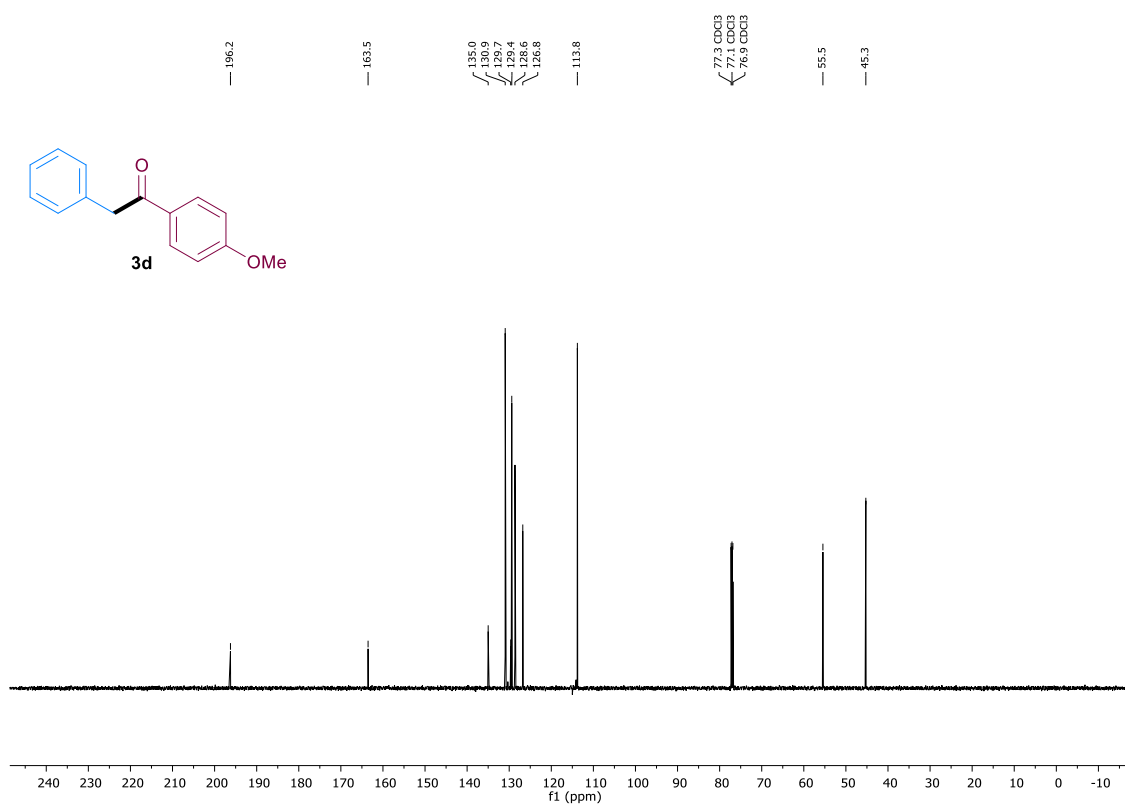

**<sup>1</sup>H-NMR (3e) [600 MHz, CDCl<sub>3</sub>]**

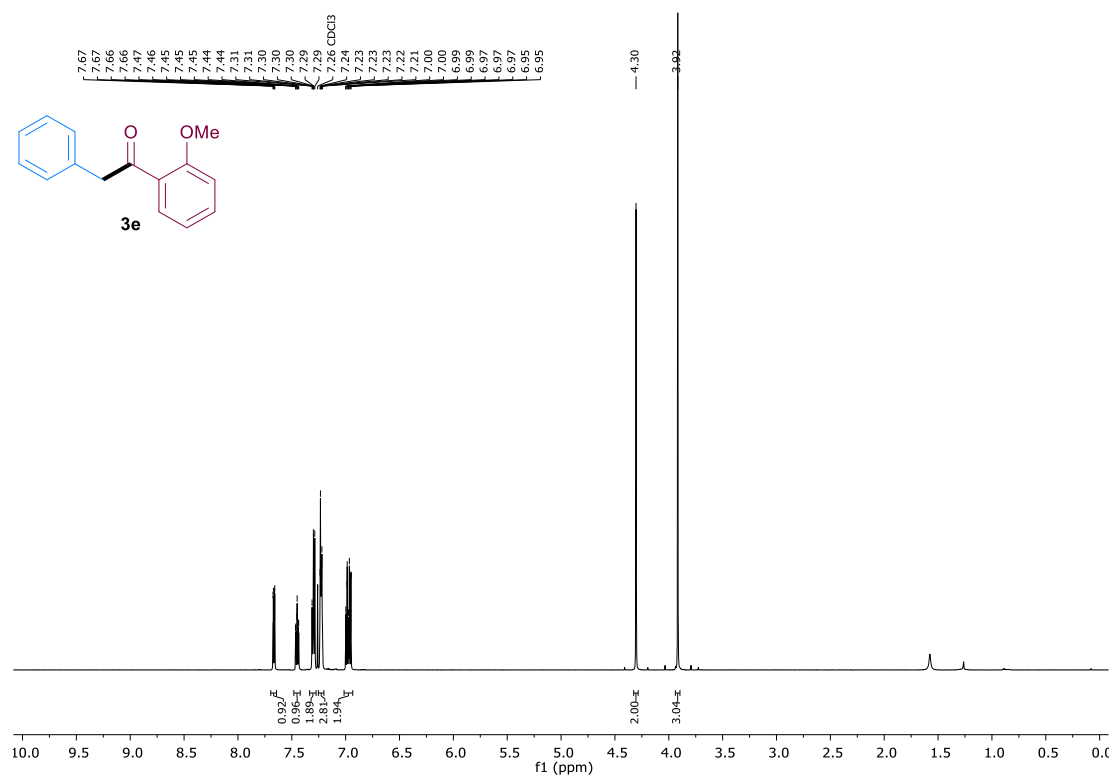

**<sup>13</sup>C-NMR (3e) [151 MHz, CDCl<sub>3</sub>]**

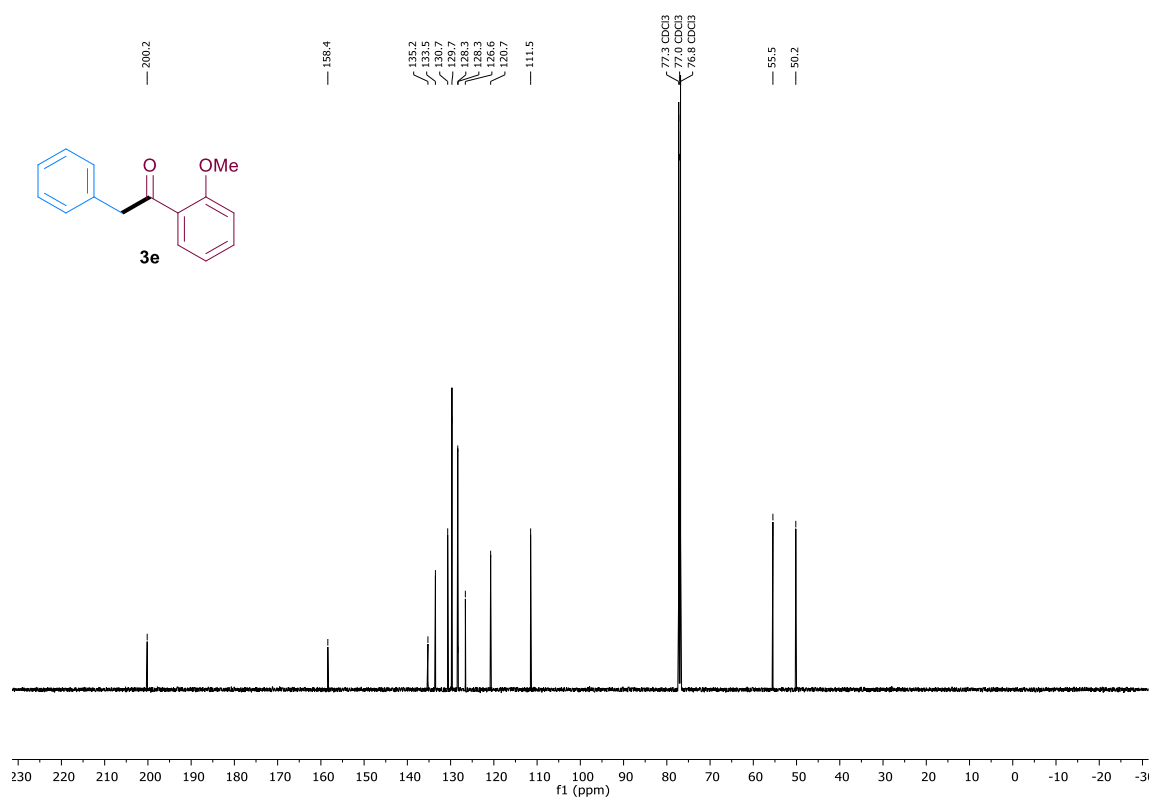

**<sup>1</sup>H-NMR (3f) [300 MHz, CDCl<sub>3</sub>]**

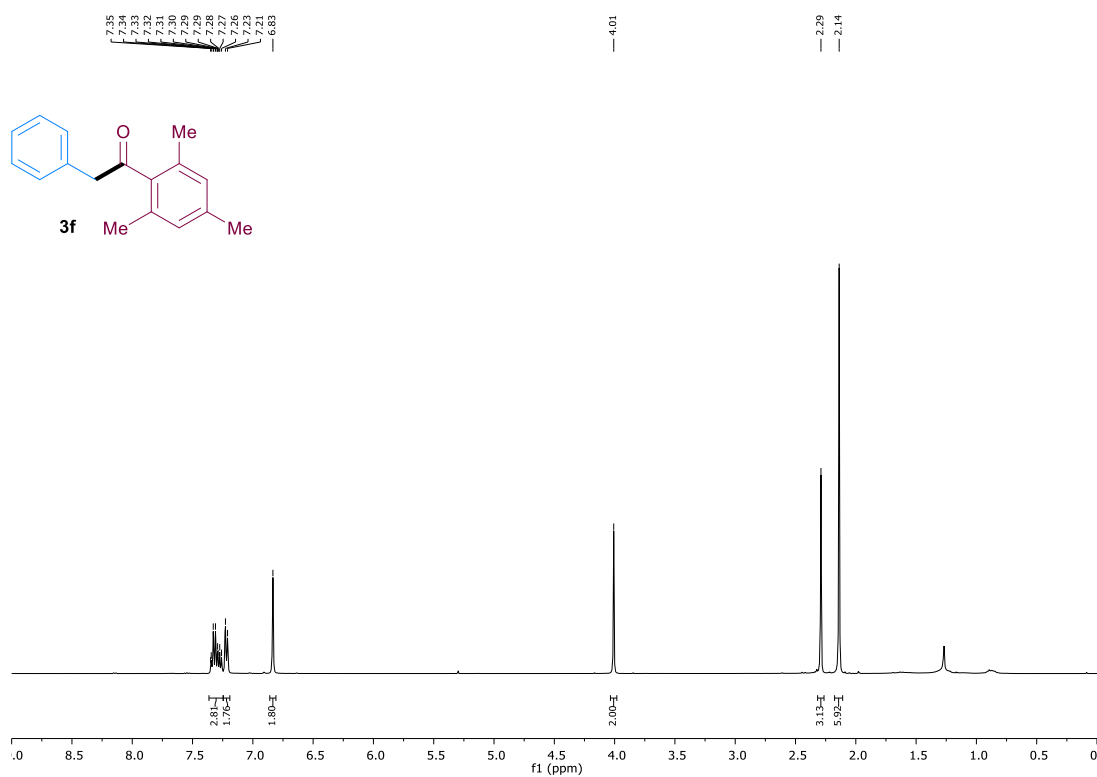

**<sup>13</sup>C-NMR (3f) [151 MHz, CDCl<sub>3</sub>]**

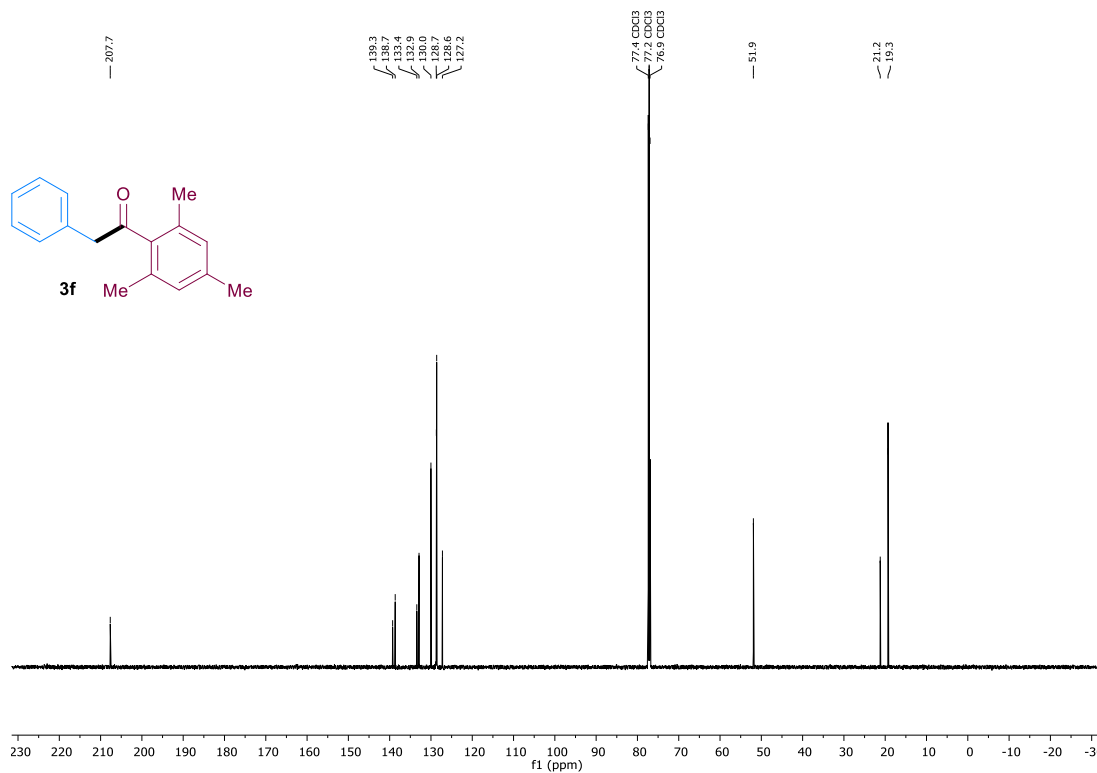

**<sup>1</sup>H-NMR (3g) [600 MHz, CDCl<sub>3</sub>]**

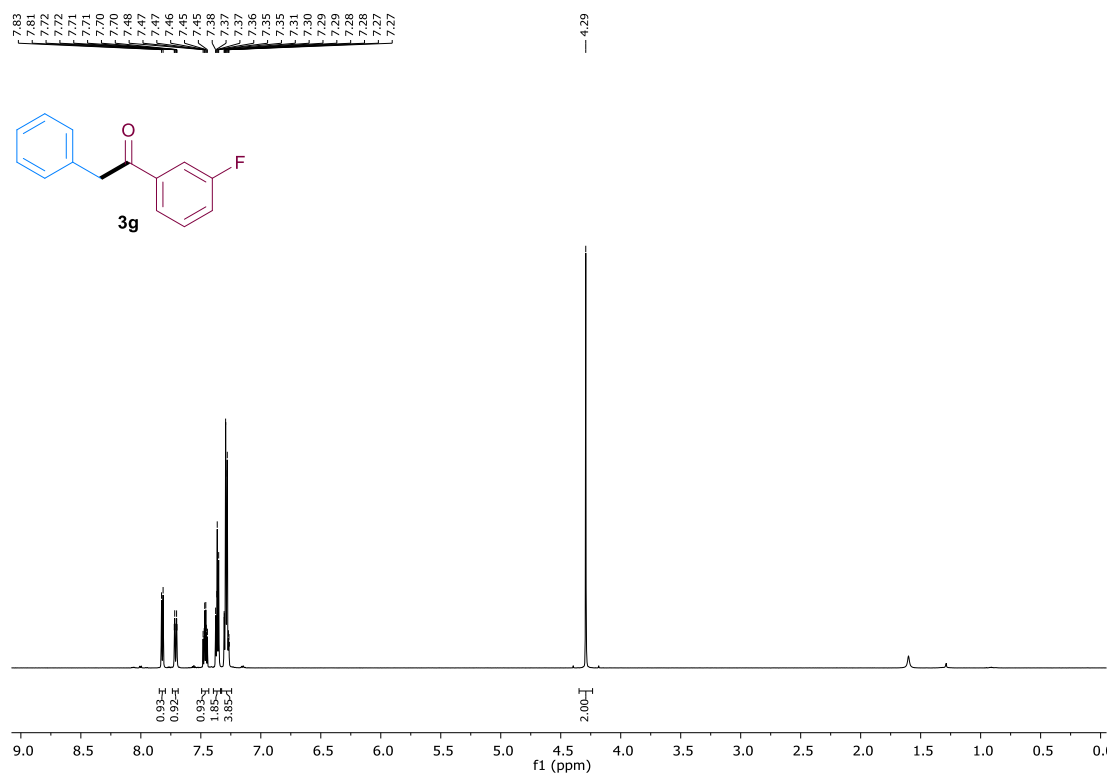

**<sup>13</sup>C-NMR (3g) [151 MHz, CDCl<sub>3</sub>]**

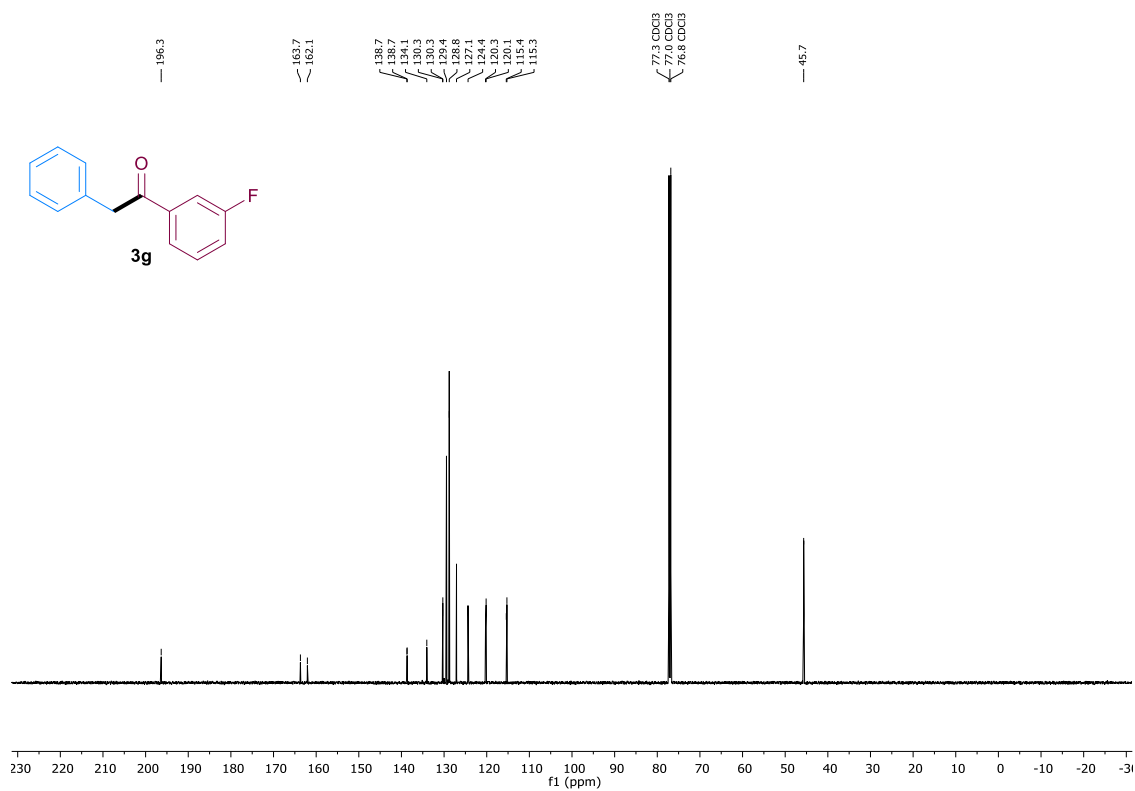

**$^{19}\text{F}$ -NMR (3g) [565 MHz,  $\text{CDCl}_3$ ]**

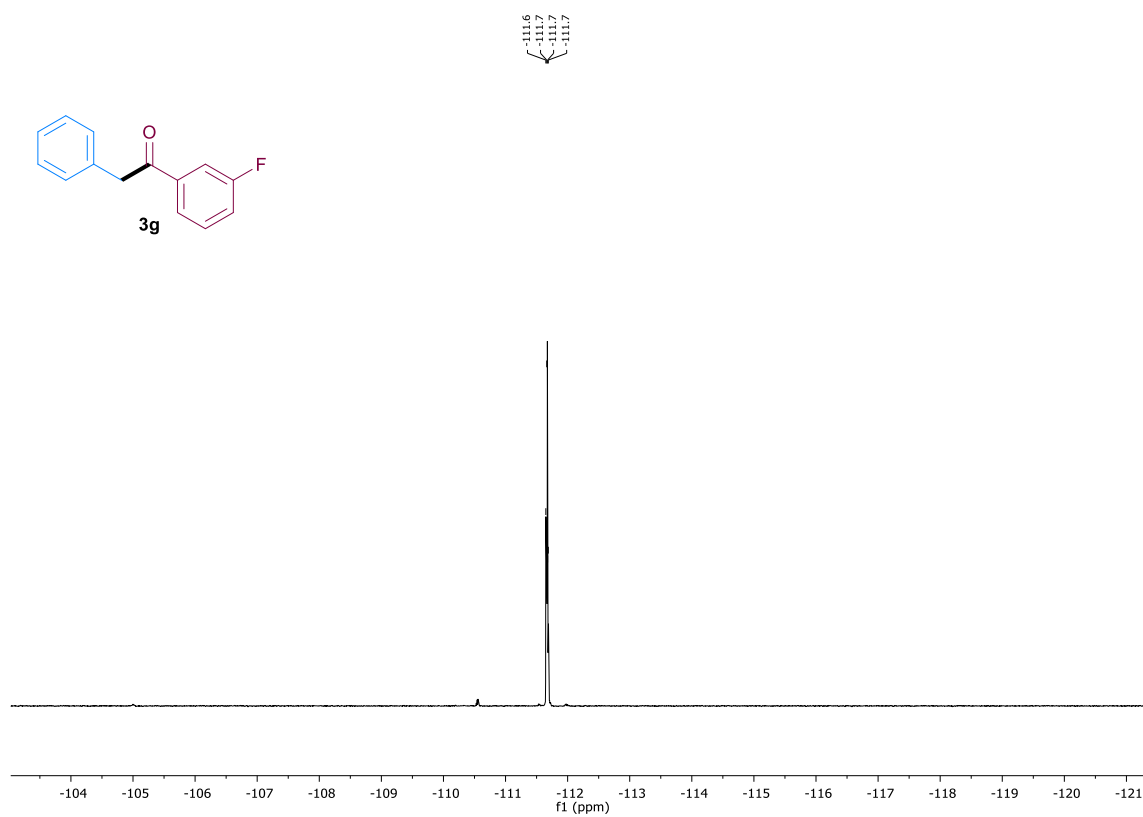

**<sup>1</sup>H-NMR (3h) [600 MHz, CDCl<sub>3</sub>]**

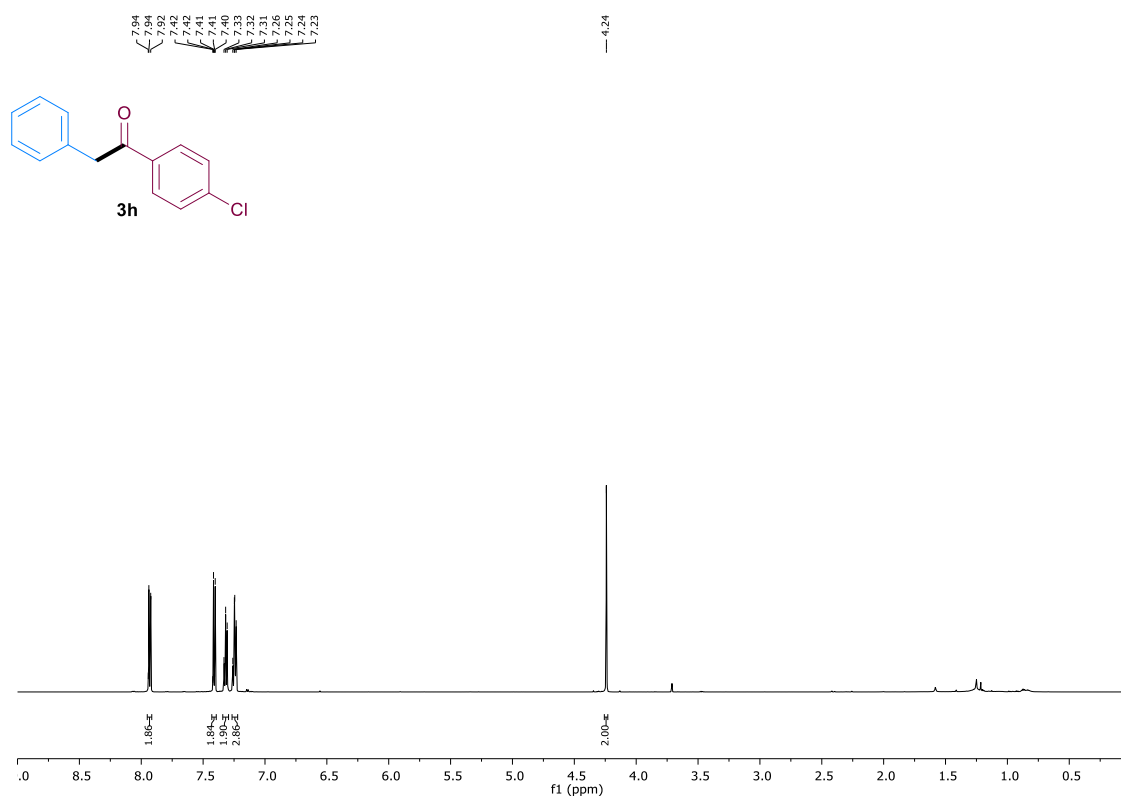

**<sup>13</sup>C-NMR (3h) [151 MHz, CDCl<sub>3</sub>]**

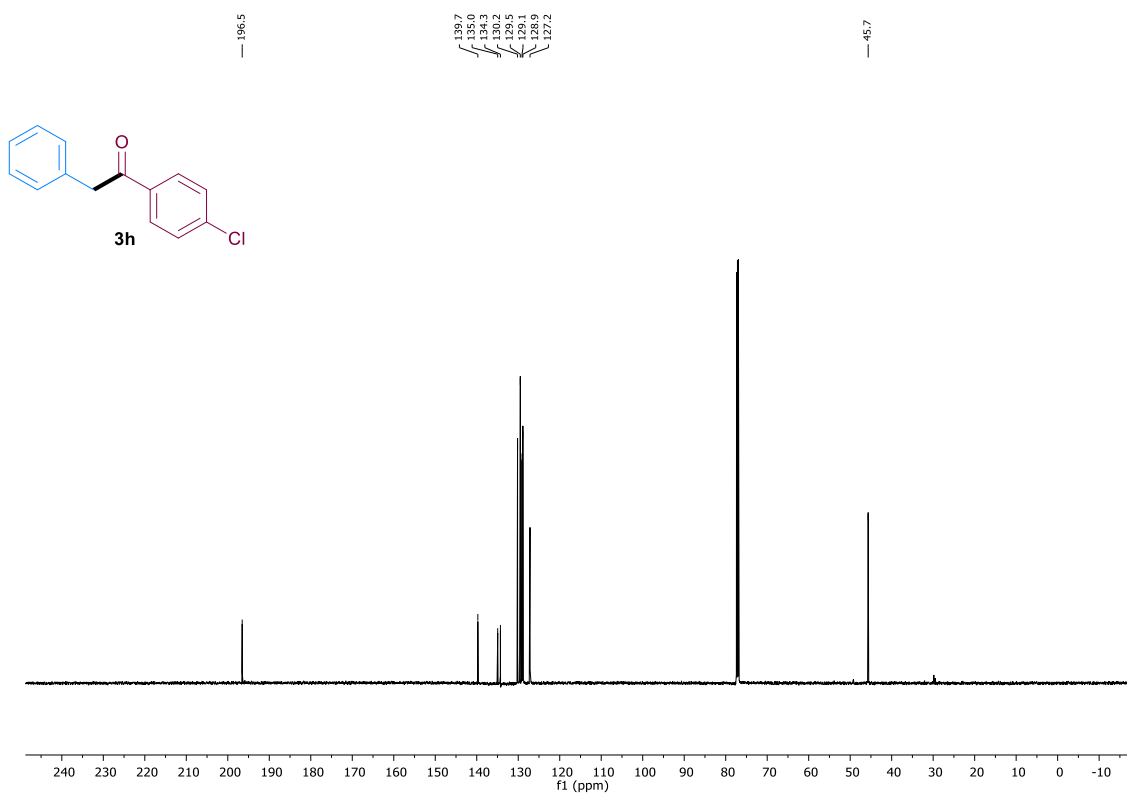

**<sup>1</sup>H-NMR (3i) [400 MHz, CDCl<sub>3</sub>]**

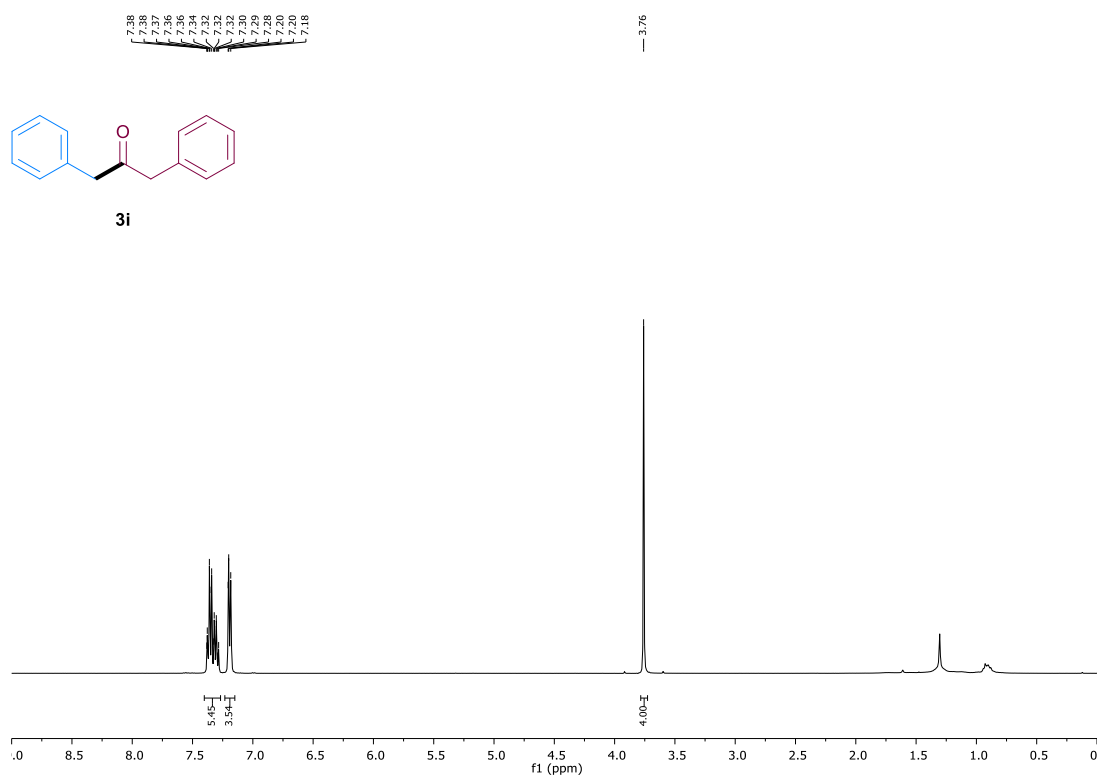

**<sup>13</sup>C-NMR (3i) [101 MHz, CDCl<sub>3</sub>]**

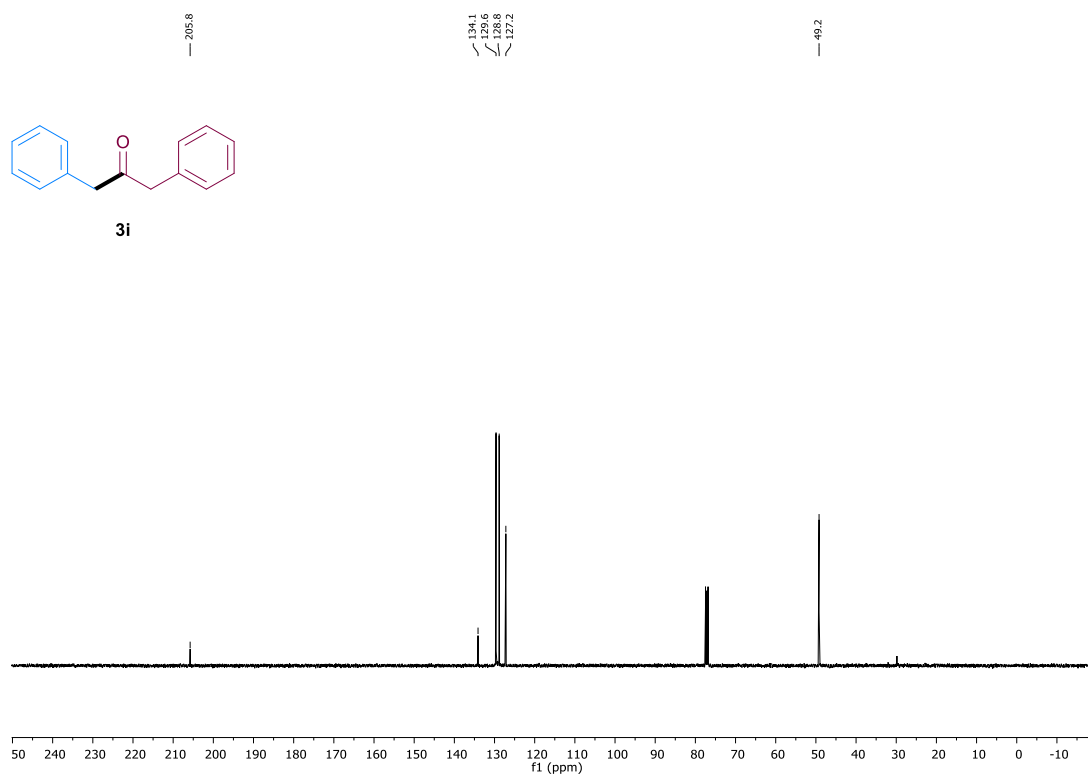

**<sup>1</sup>H-NMR (3j) [400 MHz, CDCl<sub>3</sub>]**

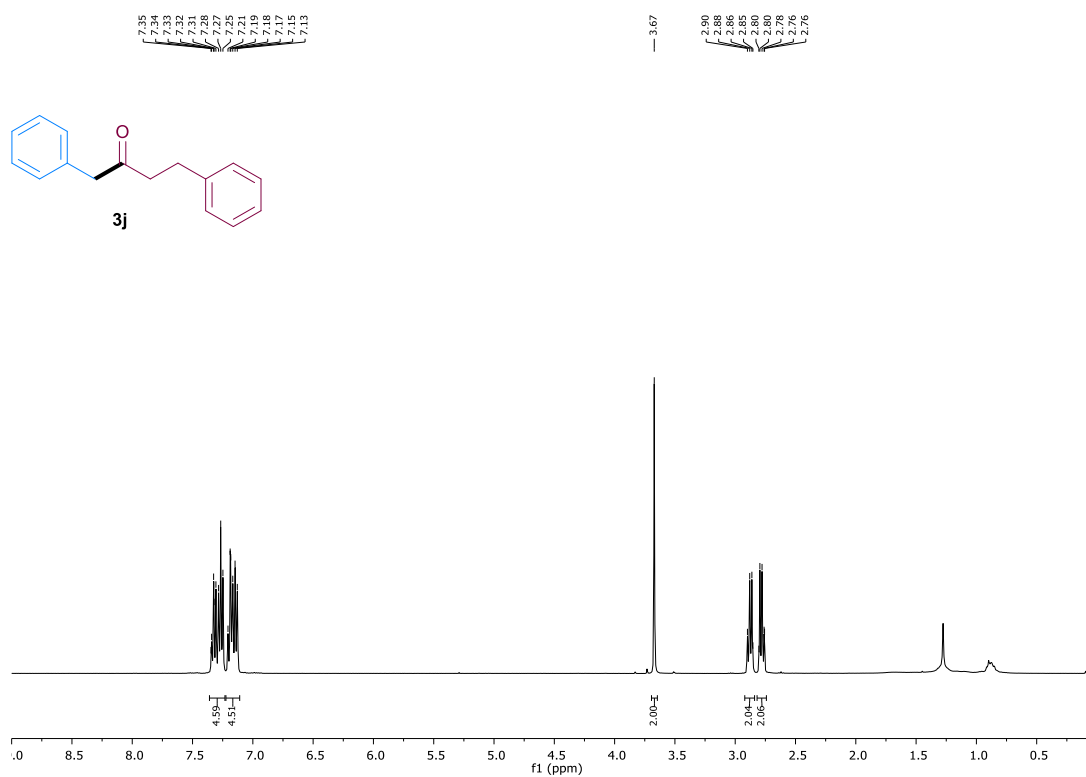

**<sup>13</sup>C-NMR (3j) [101 MHz, CDCl<sub>3</sub>]**

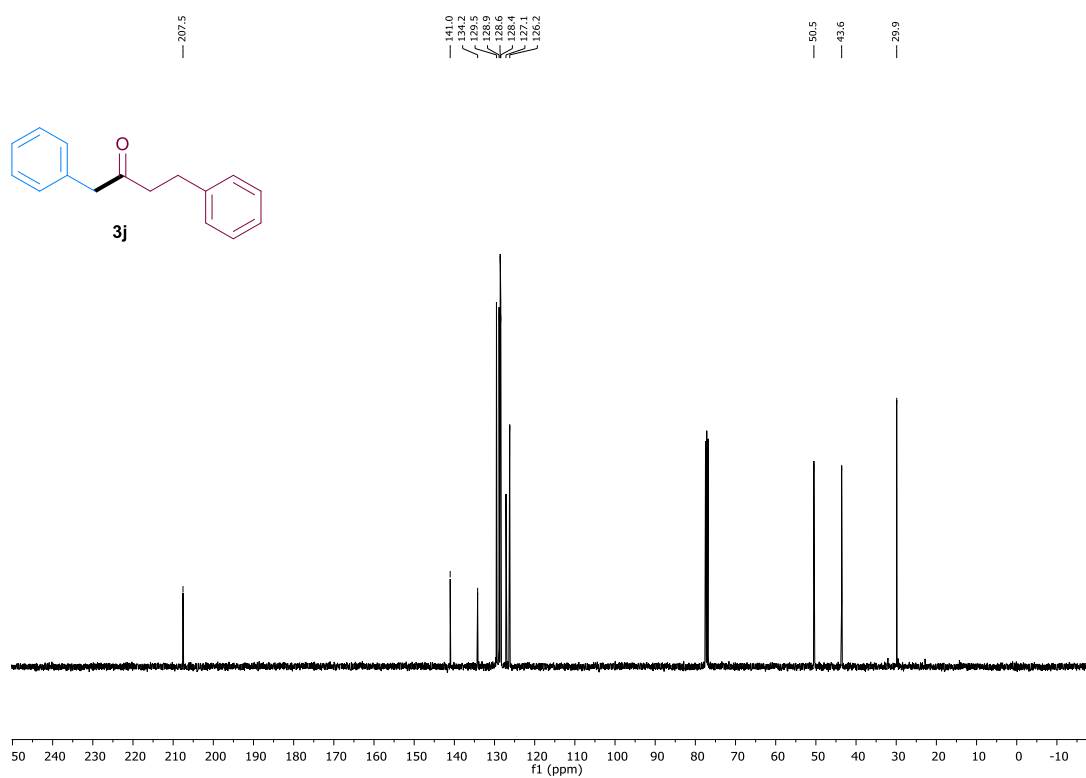



**<sup>1</sup>H-NMR (3k) [300 MHz, CDCl<sub>3</sub>]**

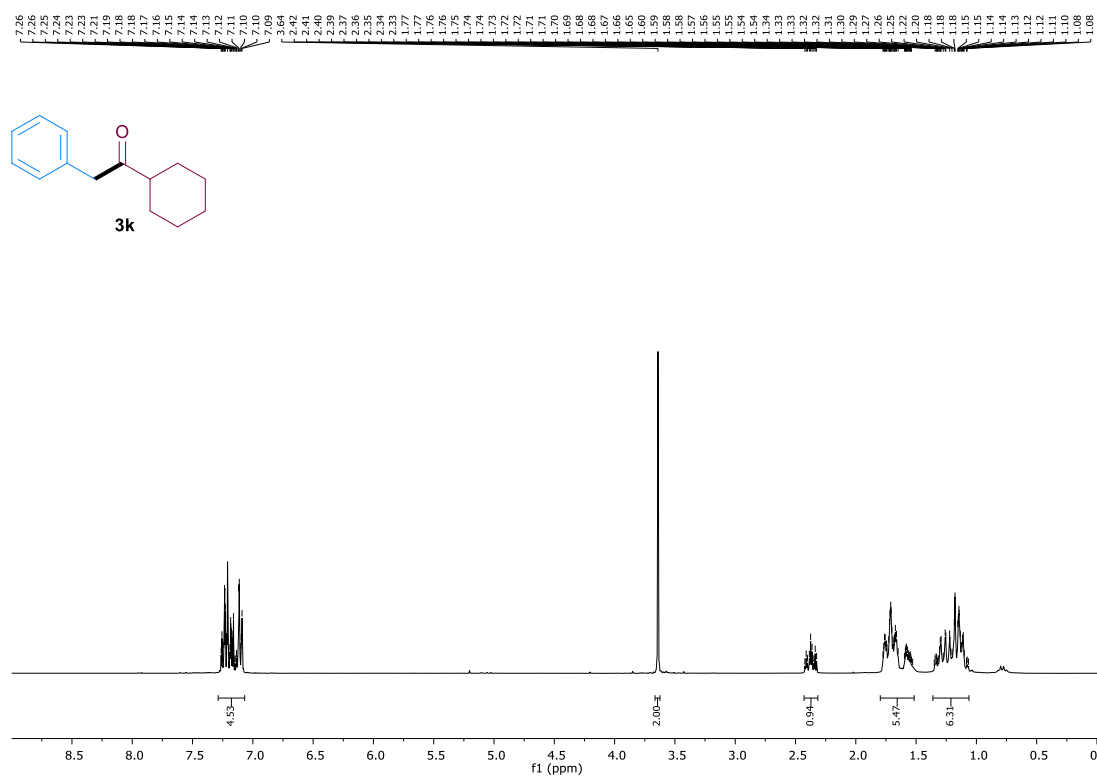

**<sup>13</sup>C-NMR (3k) [75 MHz, CDCl<sub>3</sub>]**

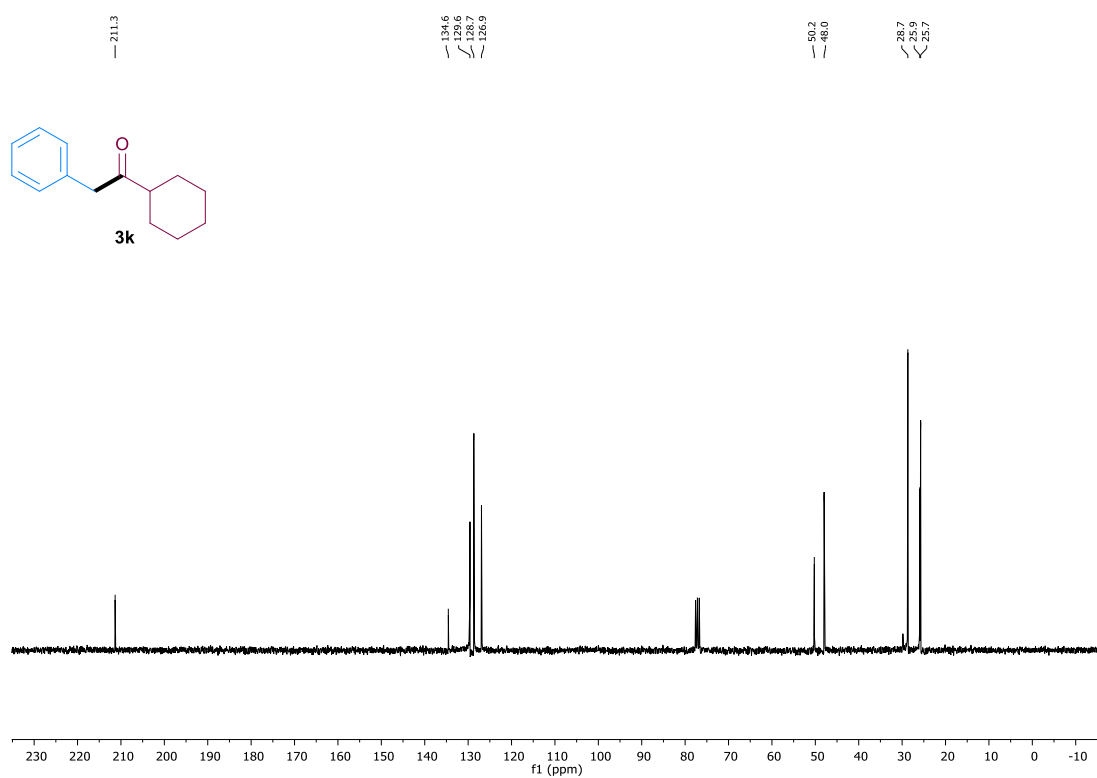

**<sup>1</sup>H-NMR (3I) [400 MHz, CDCl<sub>3</sub>]**

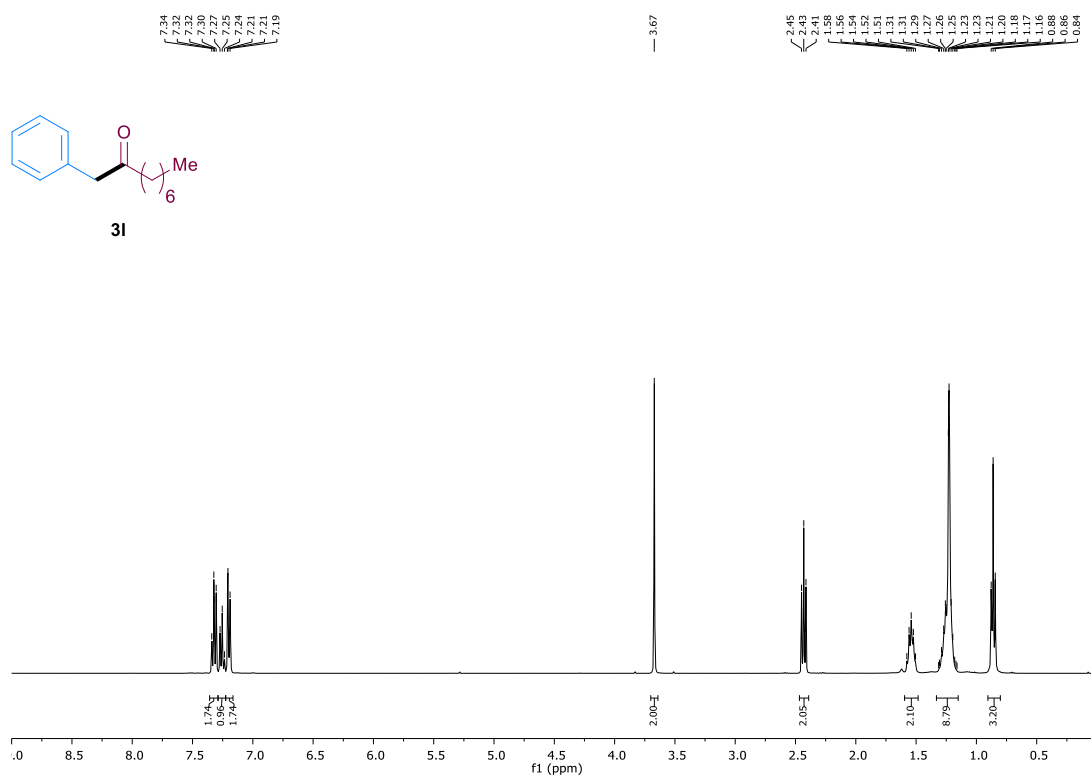

**<sup>13</sup>C-NMR (3I) [101 MHz, CDCl<sub>3</sub>]**

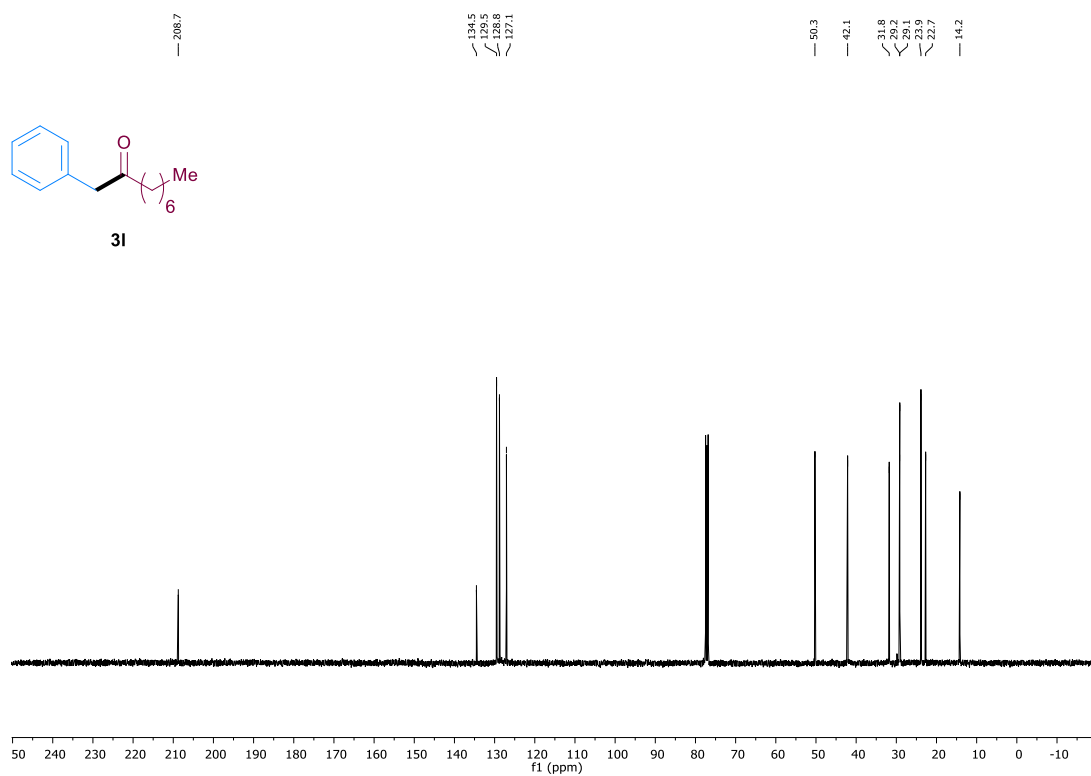

**<sup>1</sup>H-NMR (3m) [400 MHz, CDCl<sub>3</sub>]**

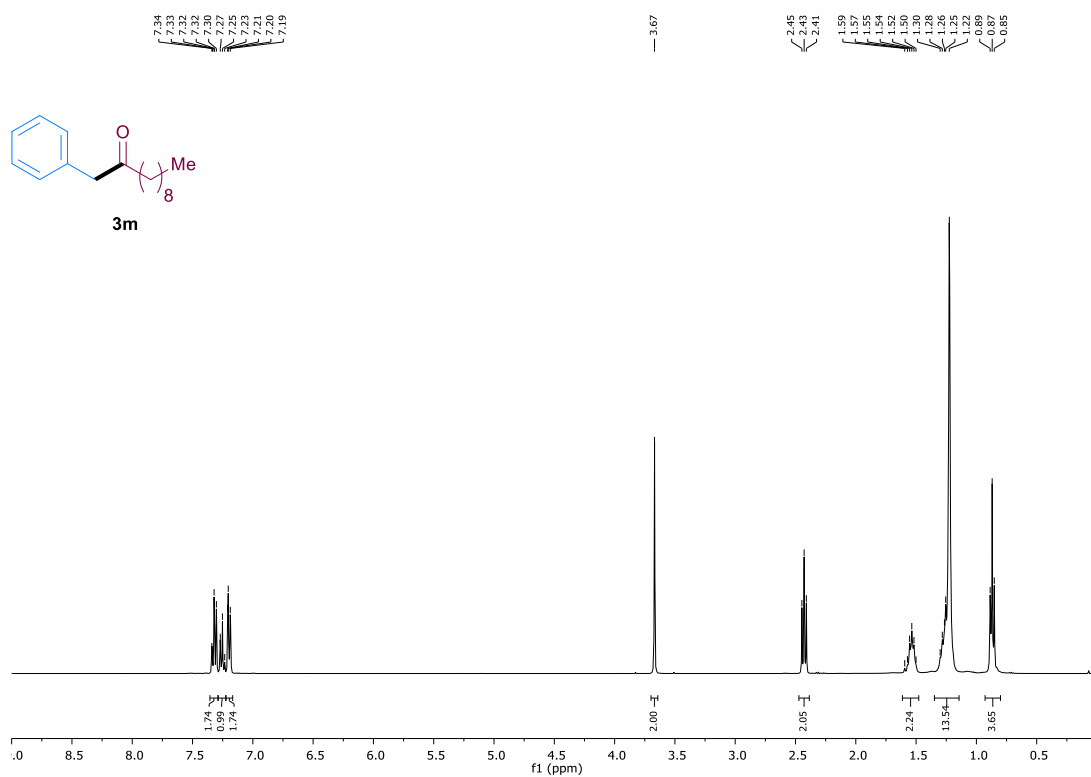

**<sup>13</sup>C-NMR (3m) [101 MHz, CDCl<sub>3</sub>]**

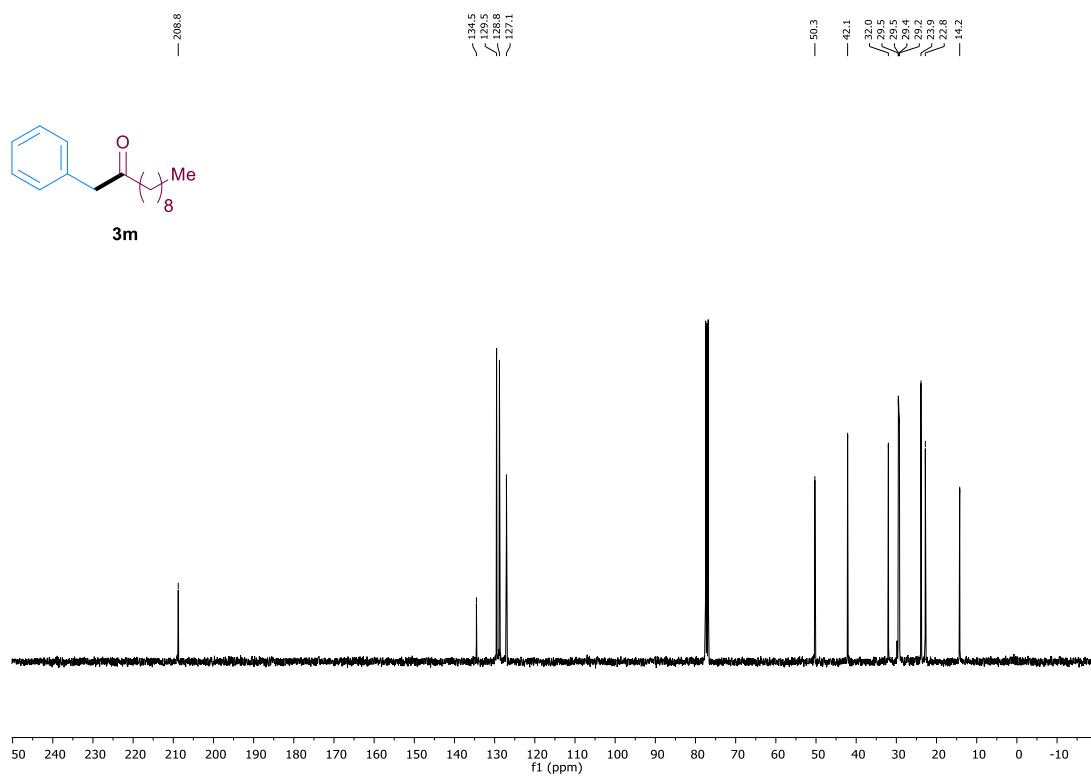

**<sup>1</sup>H-NMR (3n) [600 MHz, CDCl<sub>3</sub>]**

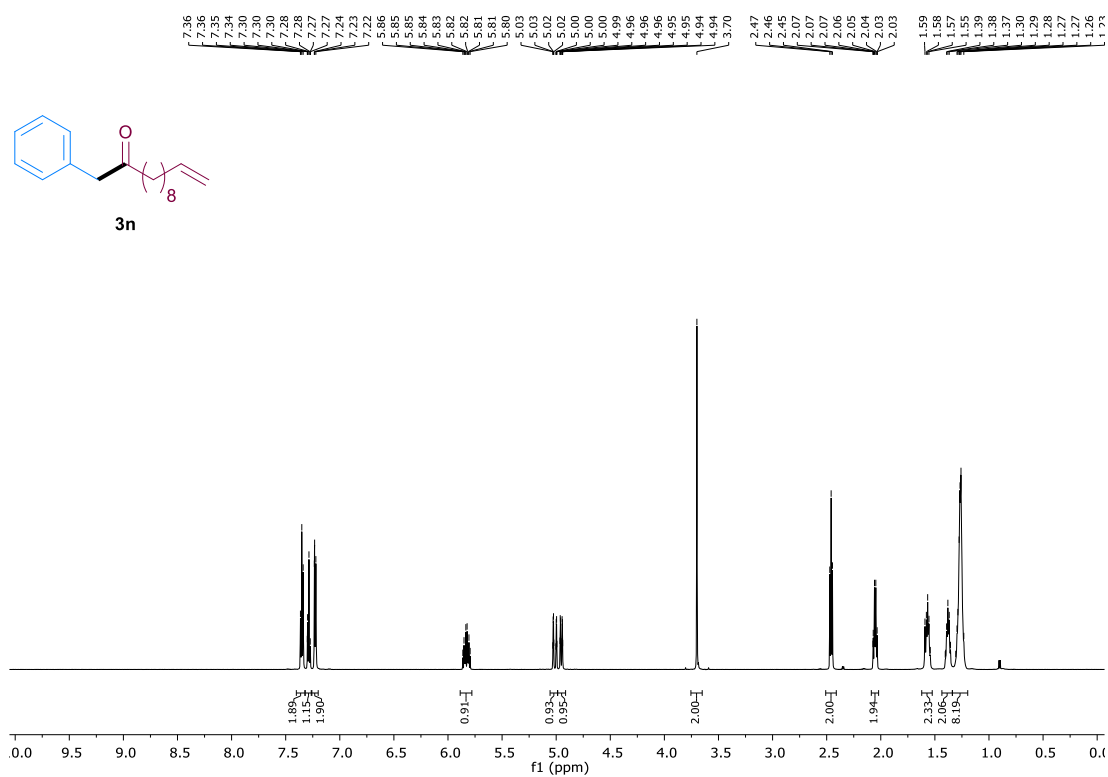

**<sup>13</sup>C-NMR (3n) [151 MHz, CDCl<sub>3</sub>]**

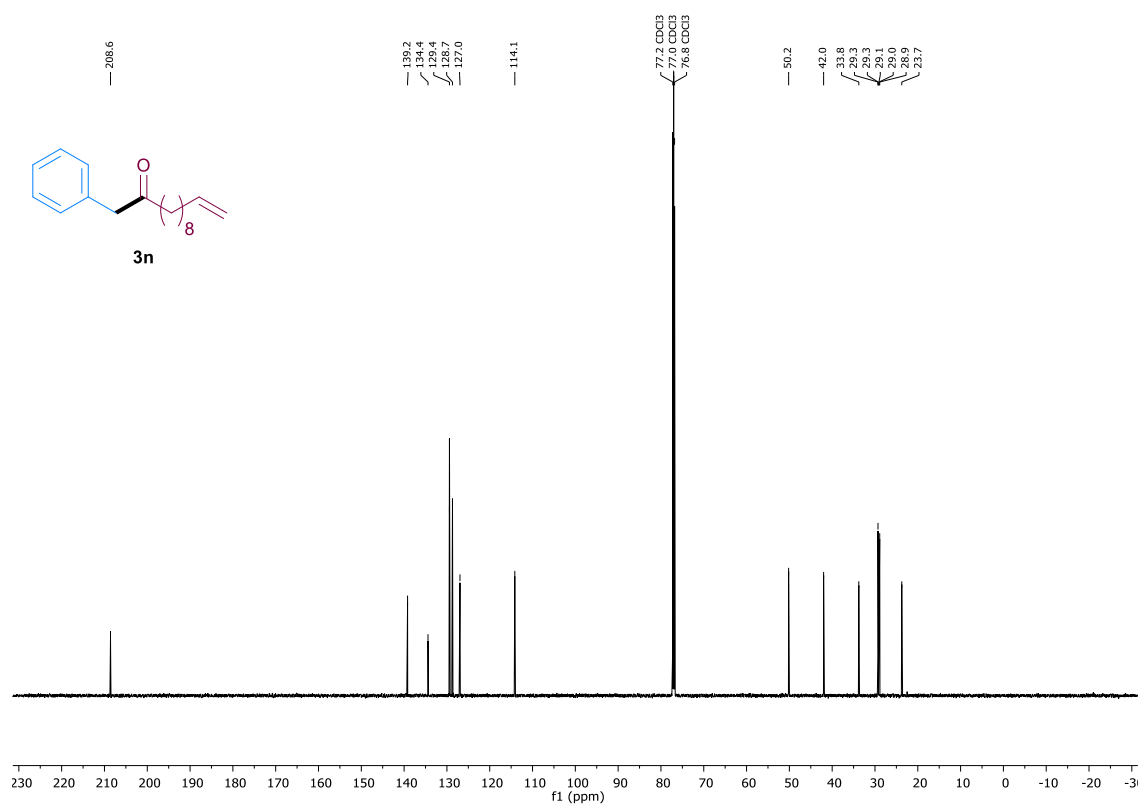

**<sup>1</sup>H-NMR (3o) [600 MHz, CDCl<sub>3</sub>]**

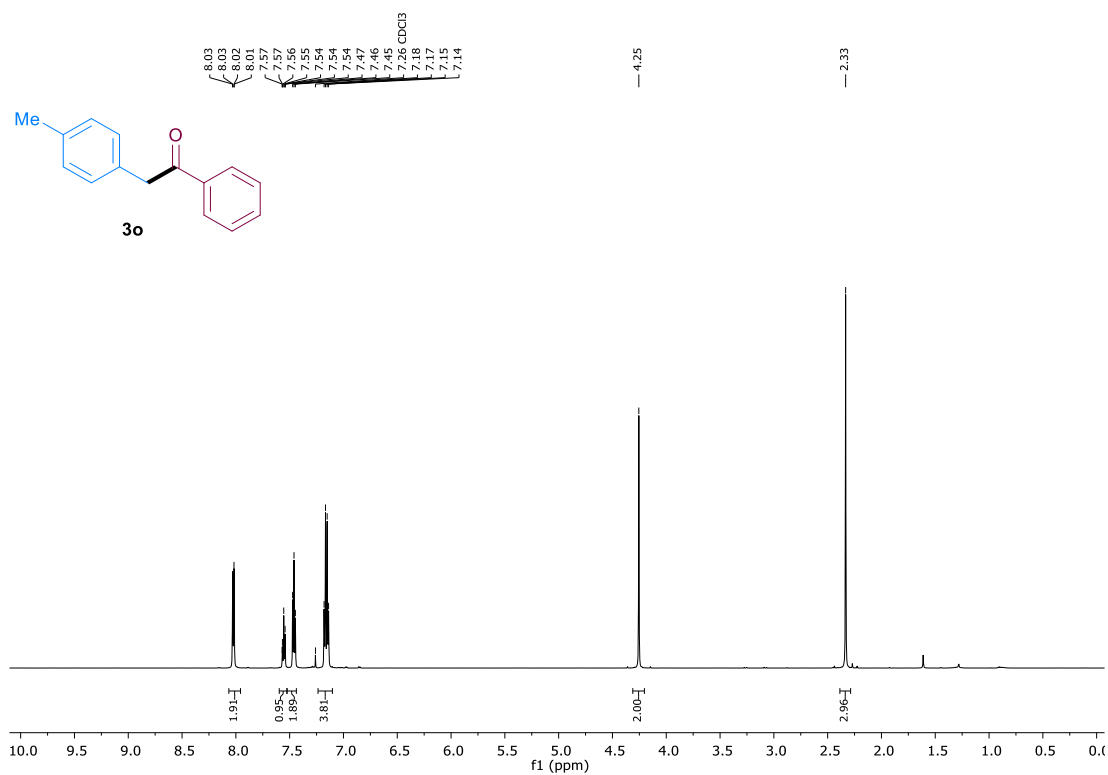

**<sup>13</sup>C-NMR (3o) [151 MHz, CDCl<sub>3</sub>]**

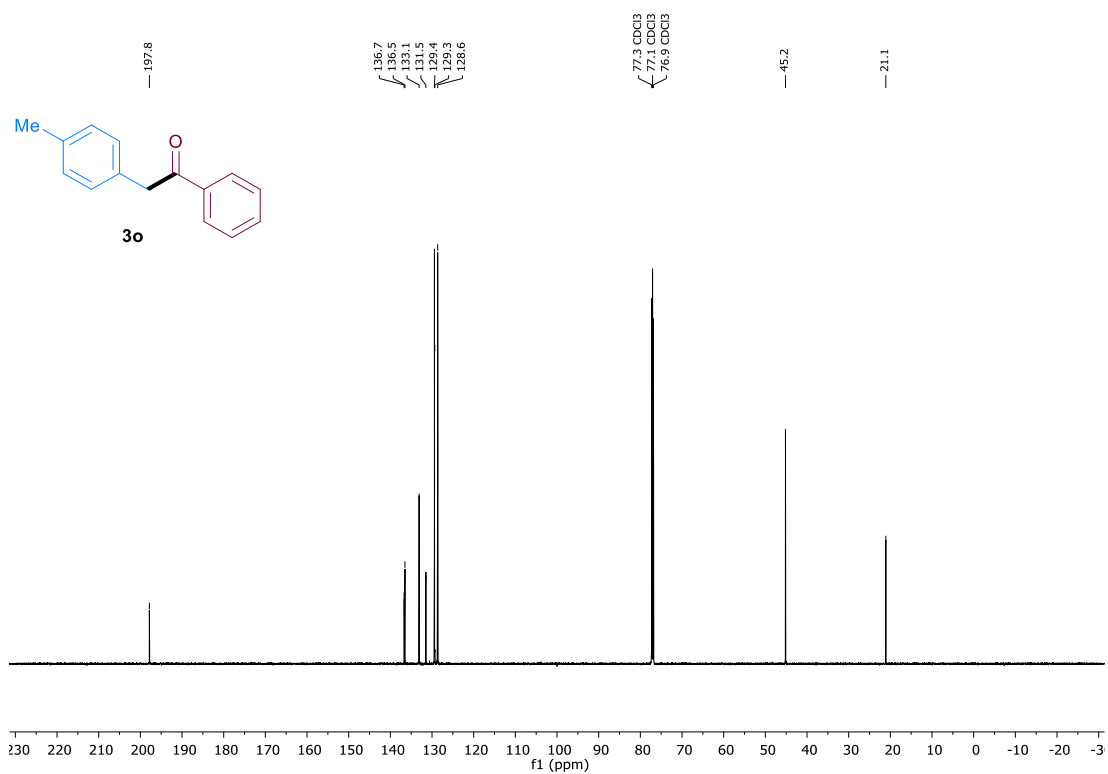

**<sup>1</sup>H-NMR (3p) [600 MHz, CDCl<sub>3</sub>]**

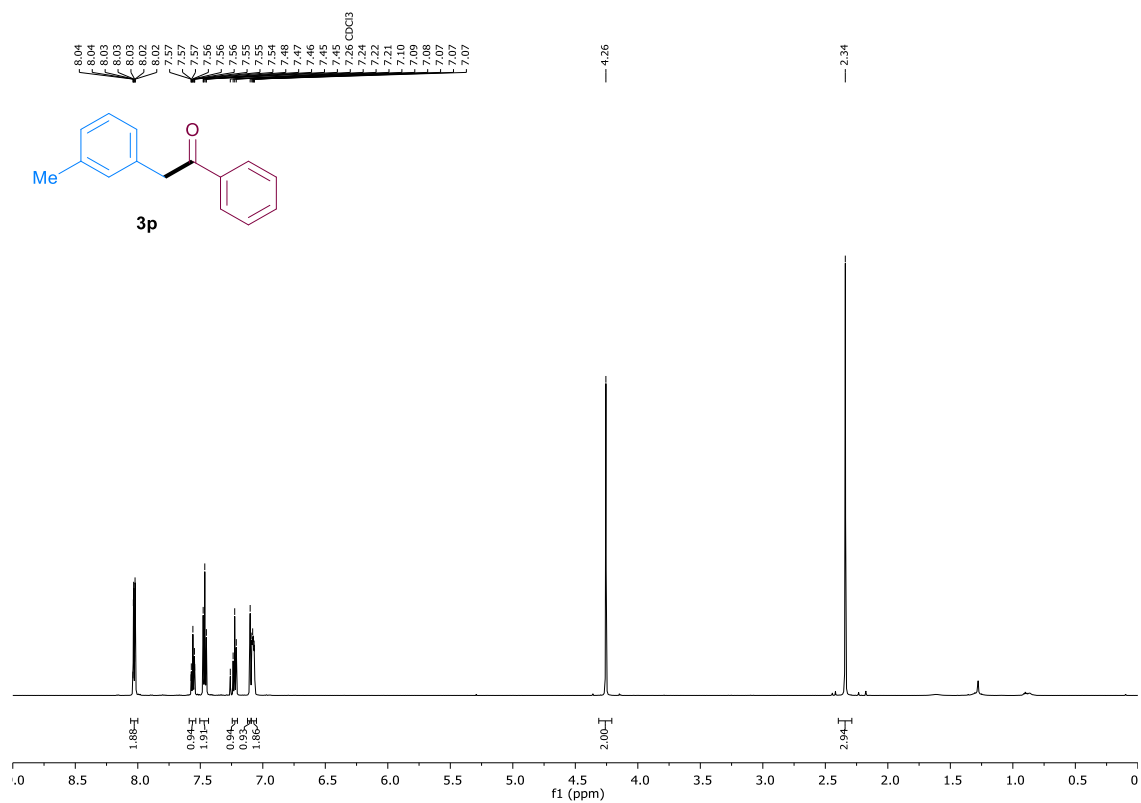

**<sup>13</sup>C-NMR (3p) [151 MHz, CDCl<sub>3</sub>]**

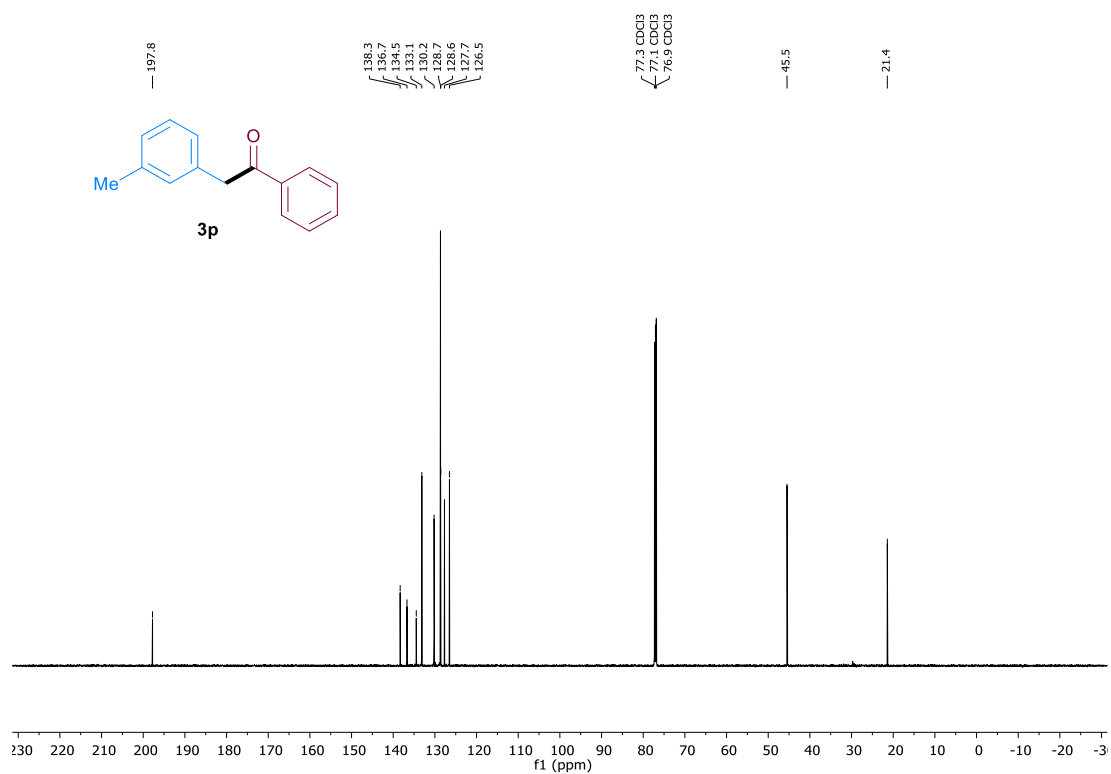

**$^1\text{H}$ -NMR (3r) [400 MHz,  $\text{CDCl}_3$ ]**

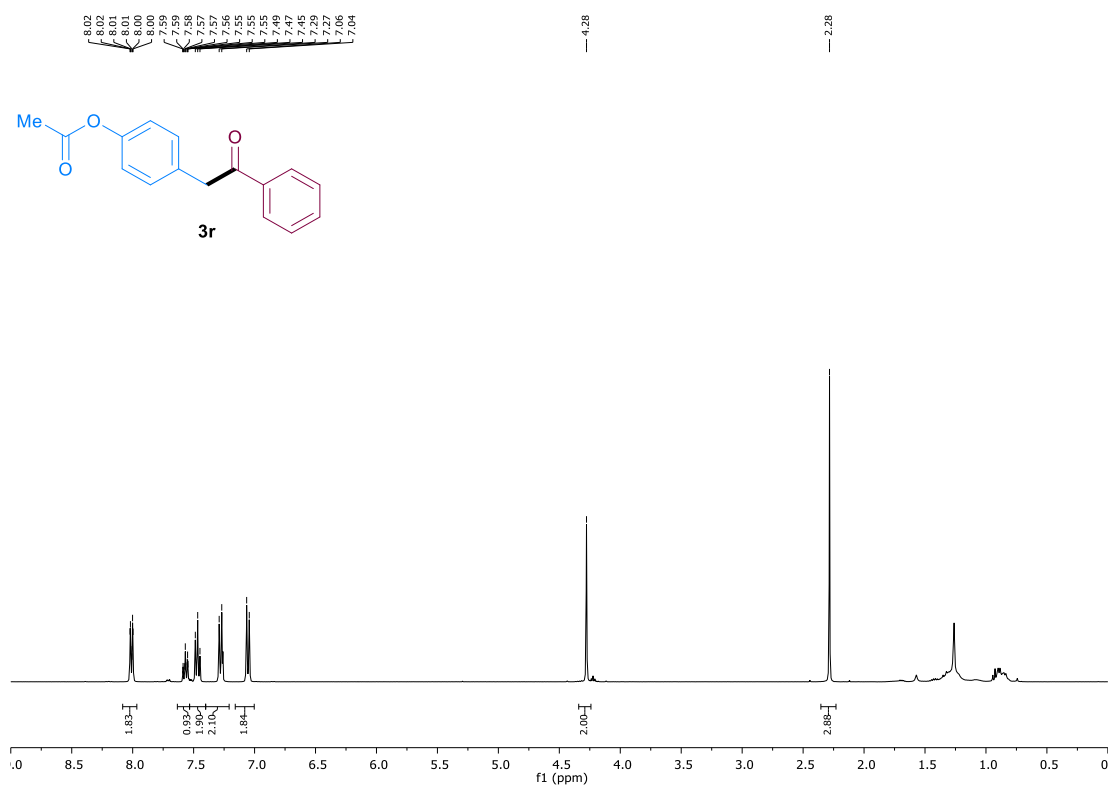

**$^{13}\text{C}$ -NMR (3r) [101 MHz,  $\text{CDCl}_3$ ]**

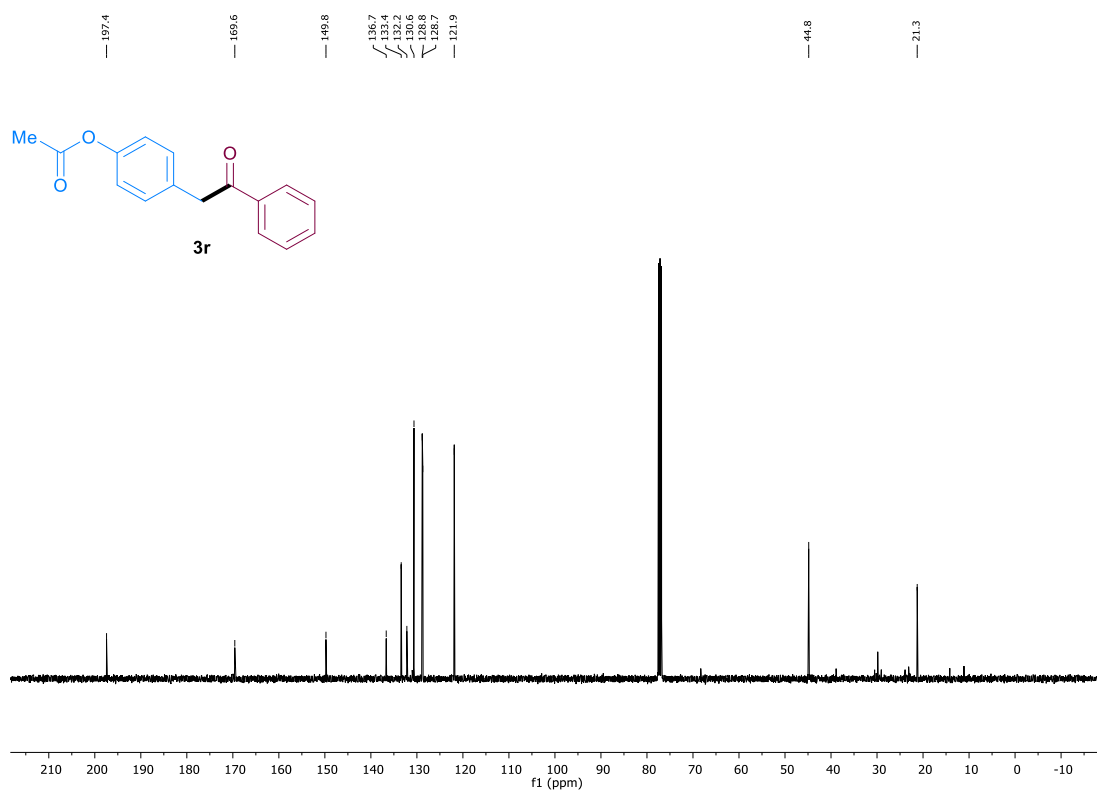

**$^1\text{H}$ -NMR (3s) [600 MHz,  $\text{CDCl}_3$ ]**

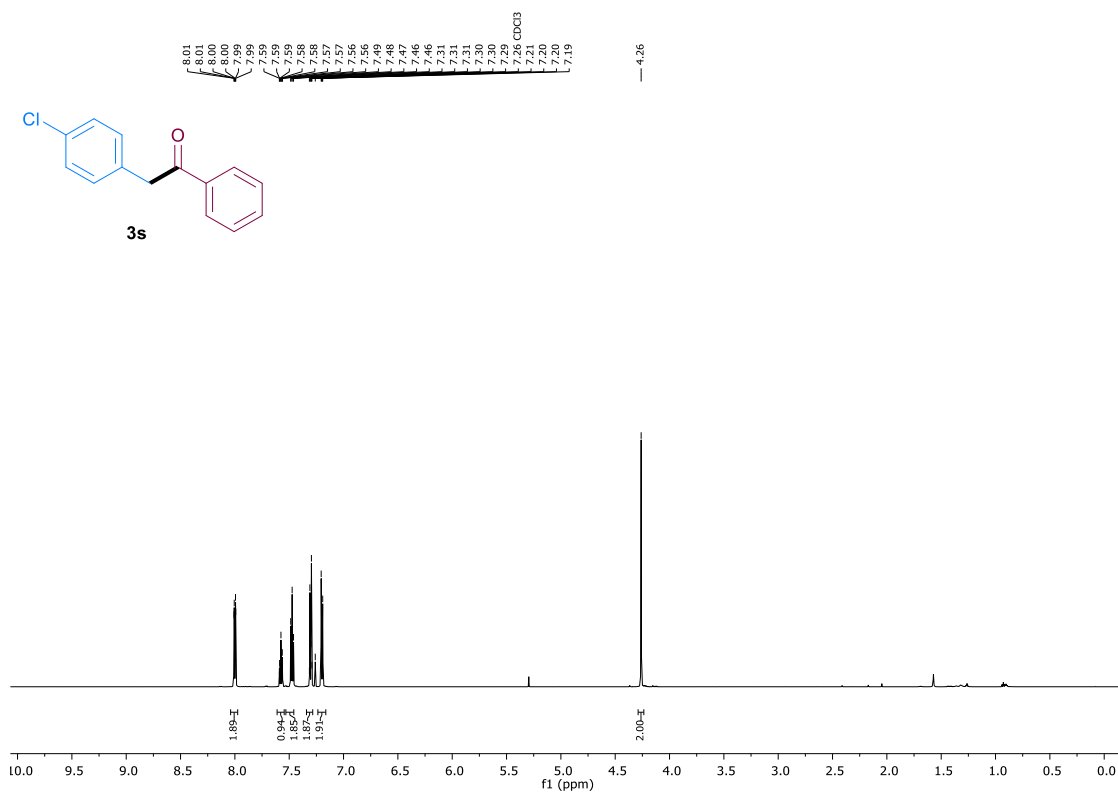

**$^{13}\text{C}$ -NMR (3s) [151 MHz,  $\text{CDCl}_3$ ]**

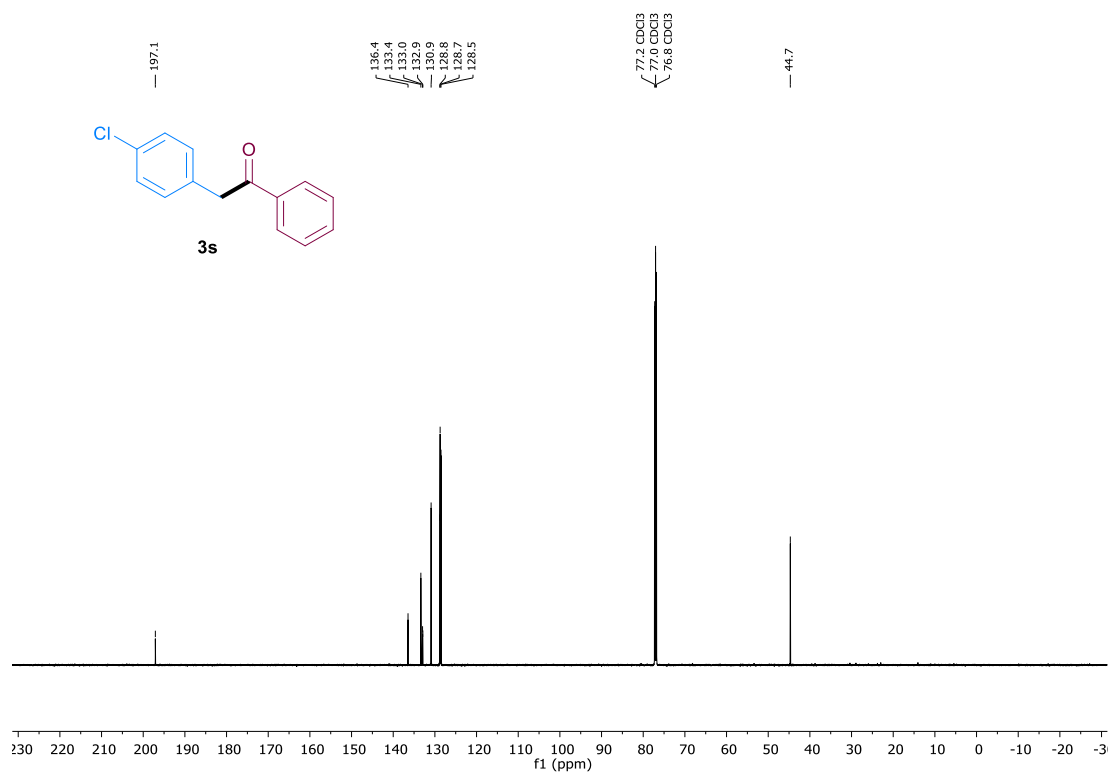



**<sup>1</sup>H-NMR (3t) [600 MHz, CDCl<sub>3</sub>]**

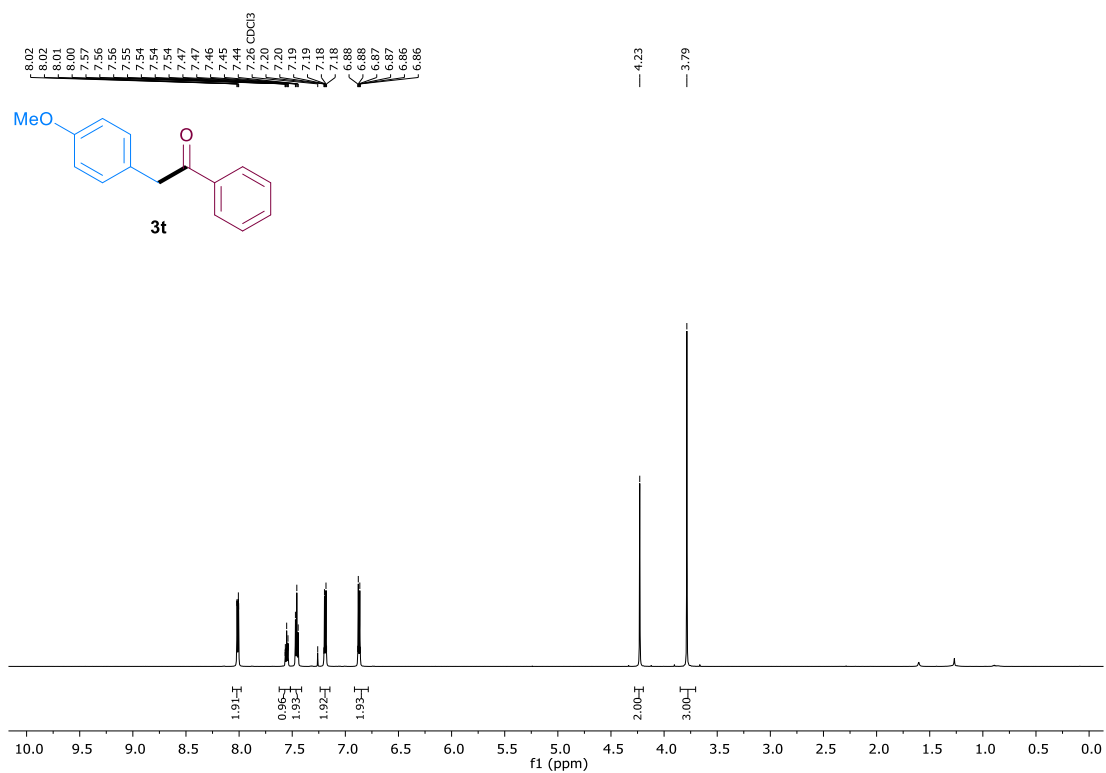

**<sup>13</sup>C-NMR (3t) [151 MHz, CDCl<sub>3</sub>]**

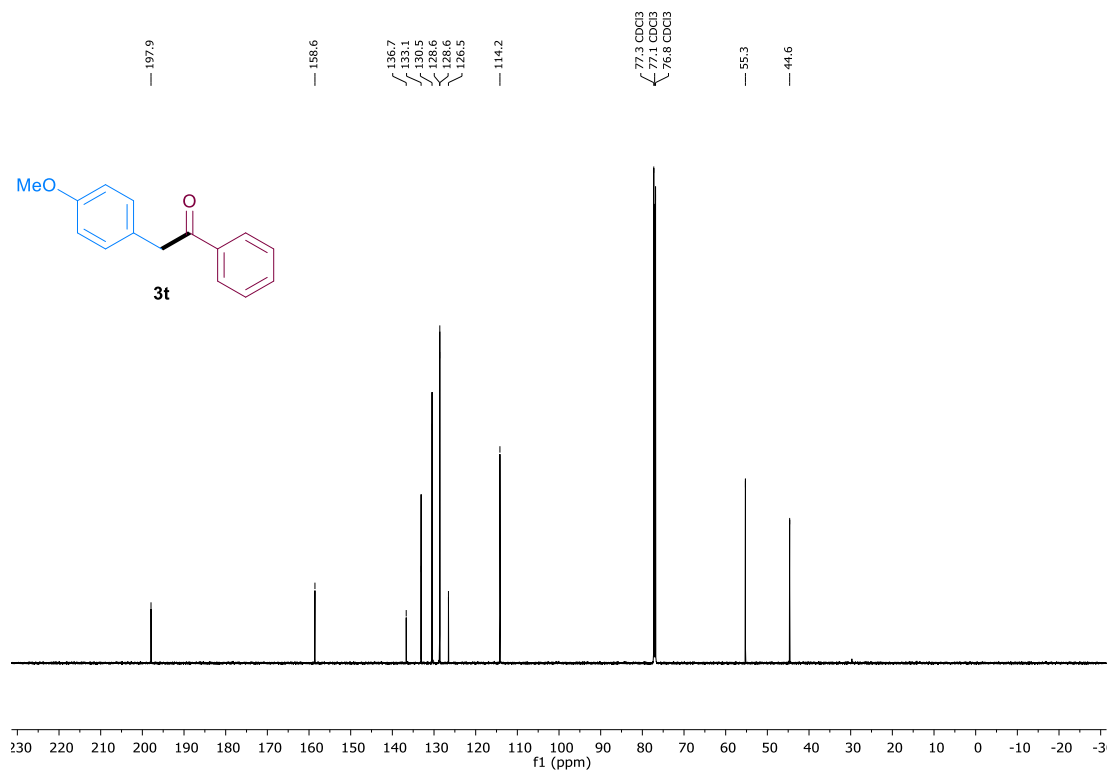

**<sup>1</sup>H-NMR (3u) [600 MHz, CDCl<sub>3</sub>]**

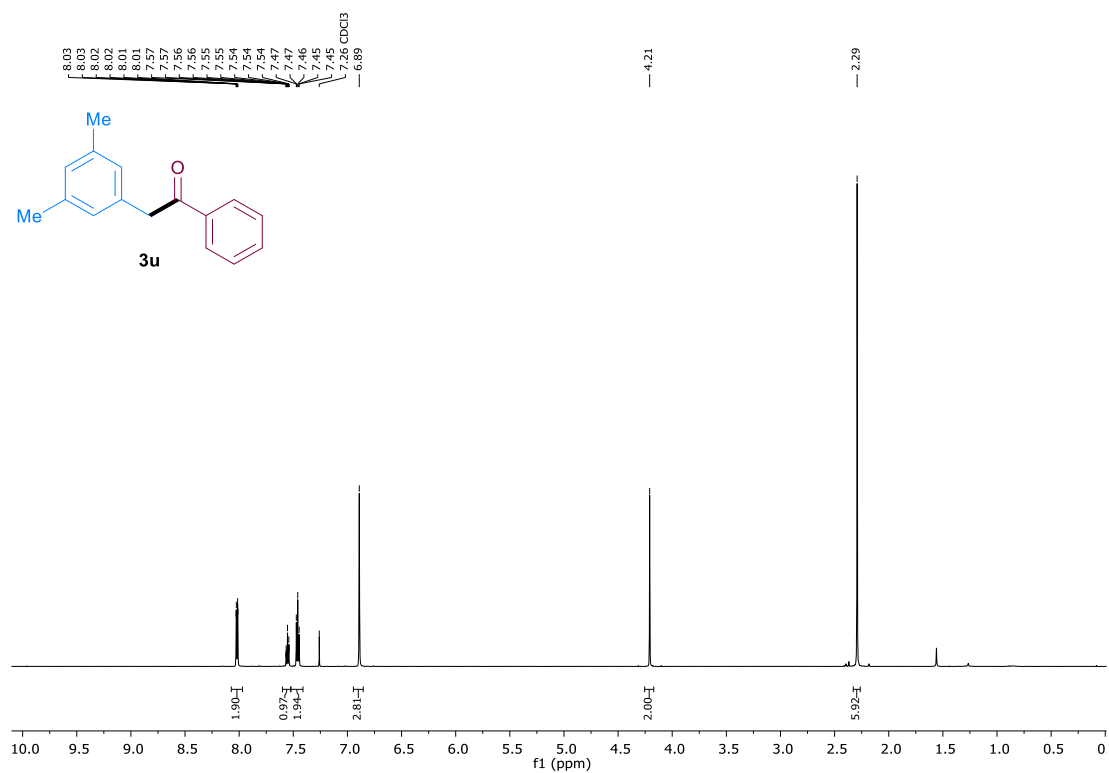

**<sup>13</sup>C-NMR (3u) [151 MHz, CDCl<sub>3</sub>]**

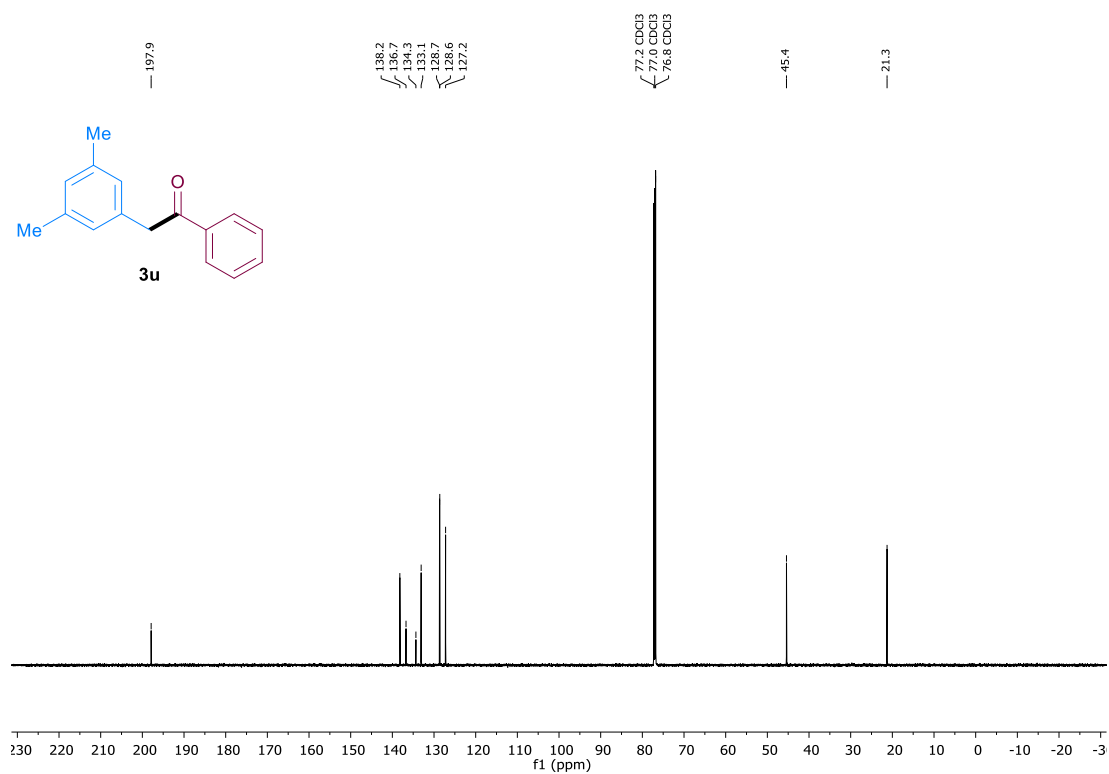

**<sup>1</sup>H-NMR (3v) [600 MHz, CDCl<sub>3</sub>]**

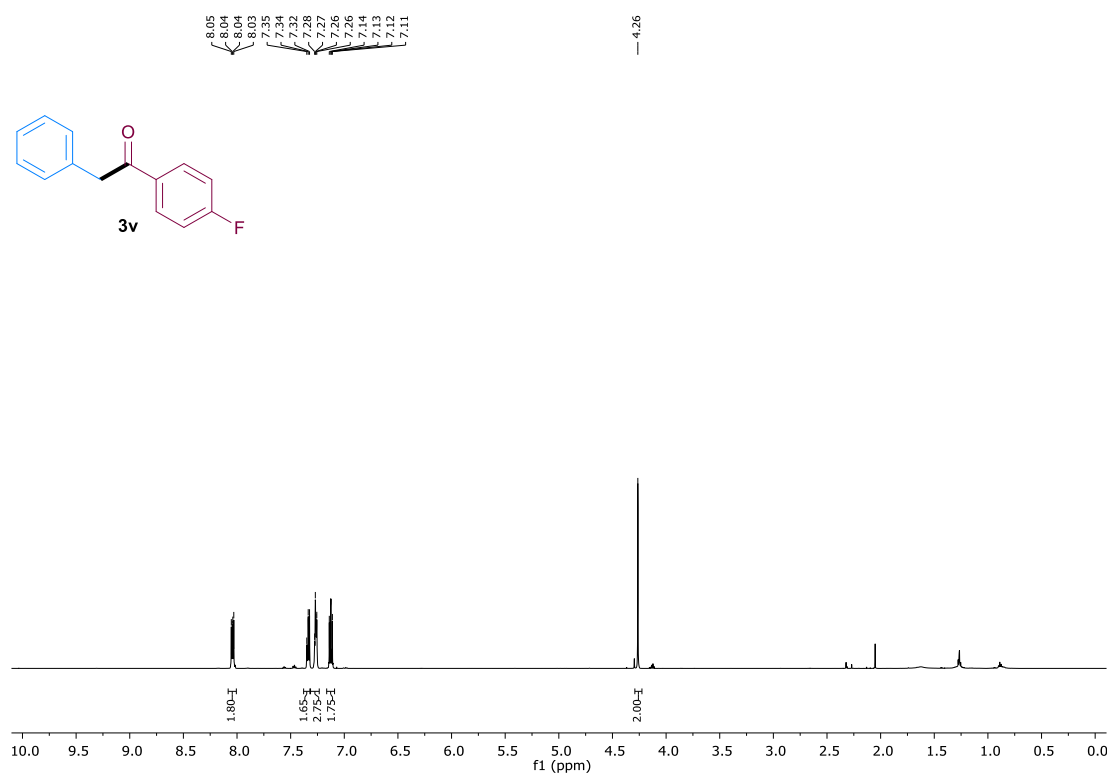

**<sup>13</sup>C-NMR (3v) [151 MHz, CDCl<sub>3</sub>]**

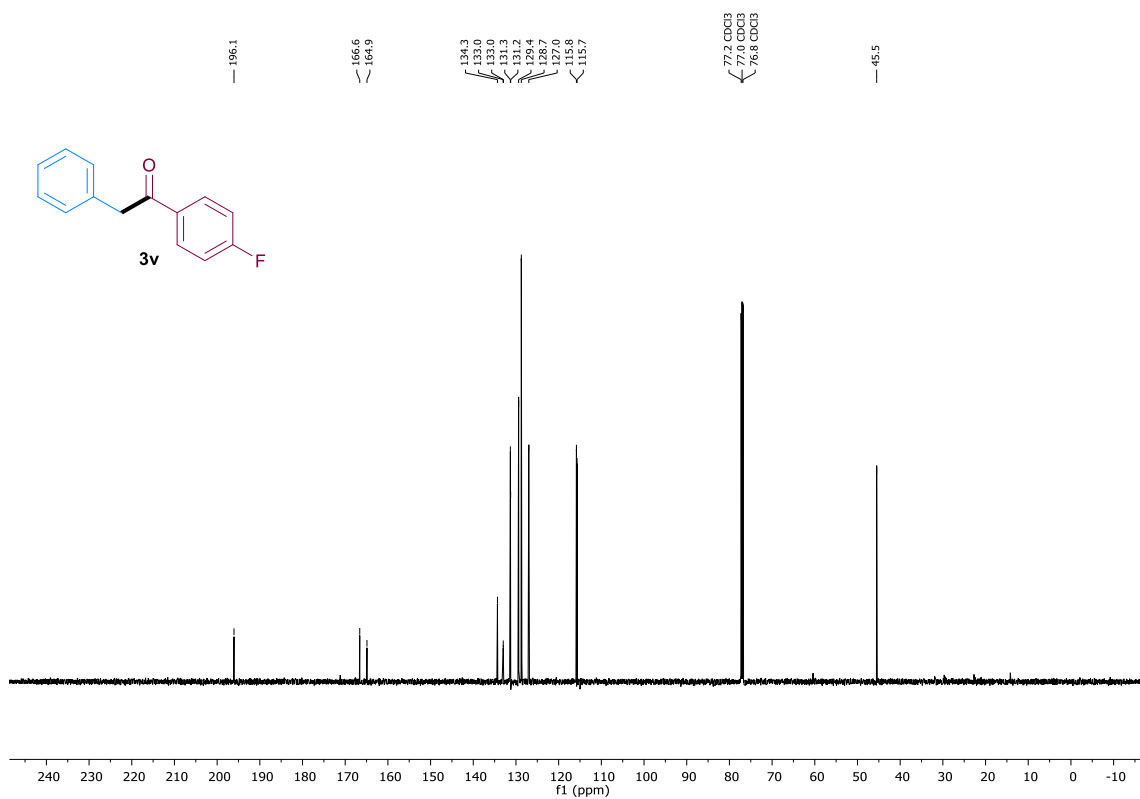

**$^{19}\text{F}$ -NMR (3v) [564 MHz,  $\text{CDCl}_3$ ]**

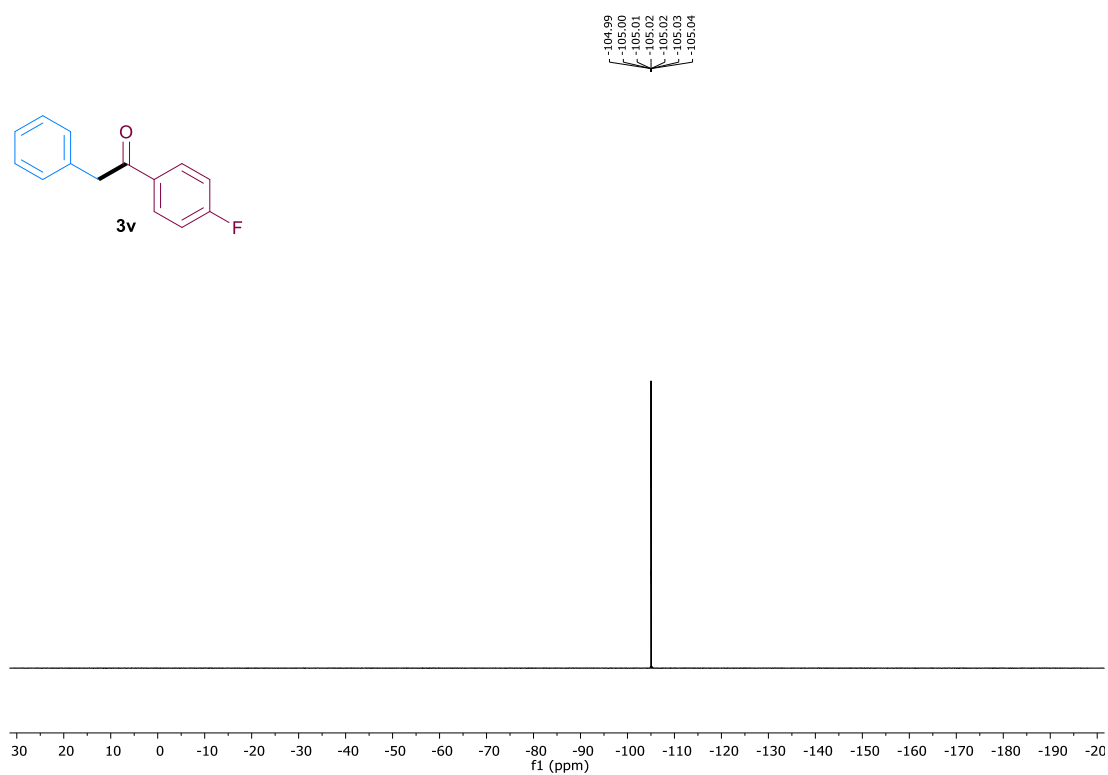

**<sup>1</sup>H-NMR (3w) [600 MHz, CDCl<sub>3</sub>]**

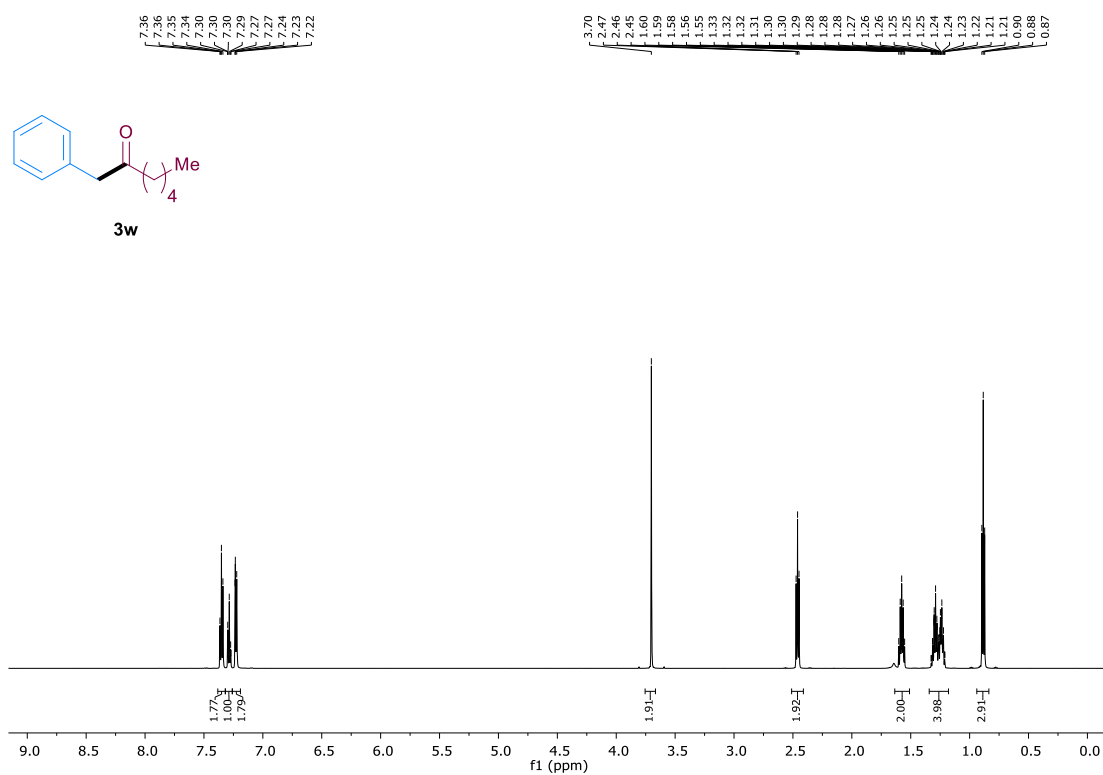

**<sup>13</sup>C-NMR (3w) [151 MHz, CDCl<sub>3</sub>]**

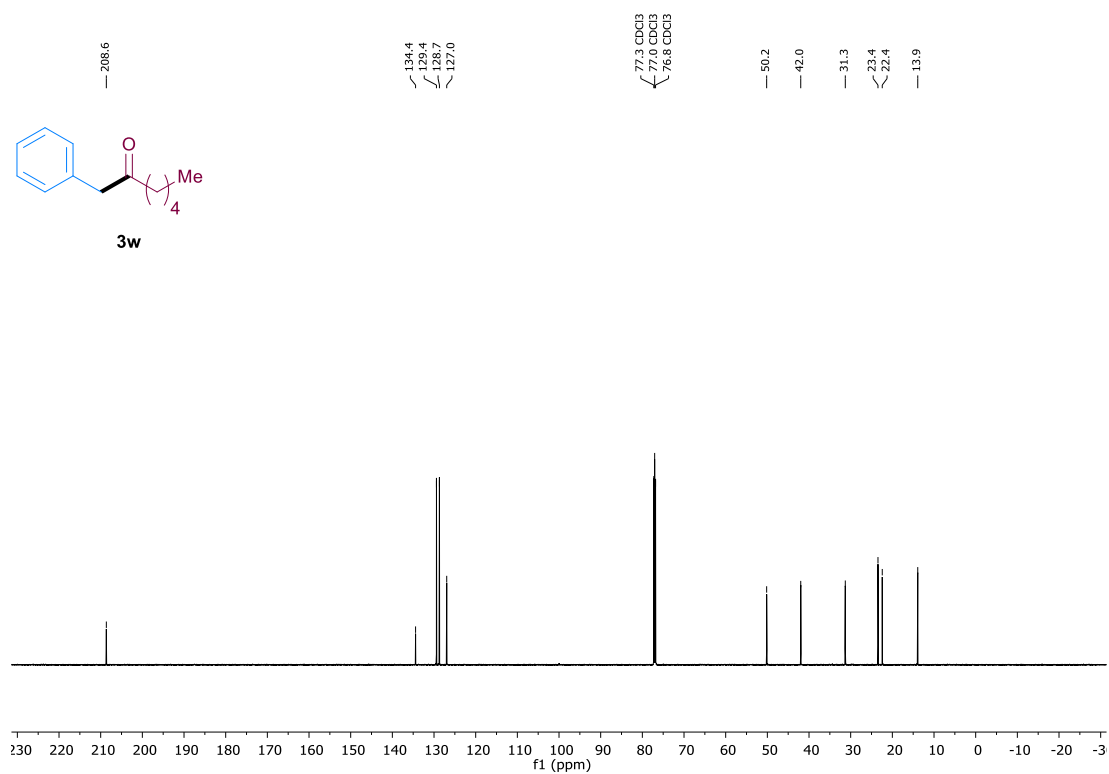

**<sup>1</sup>H-NMR (3x) [600 MHz, CDCl<sub>3</sub>]**

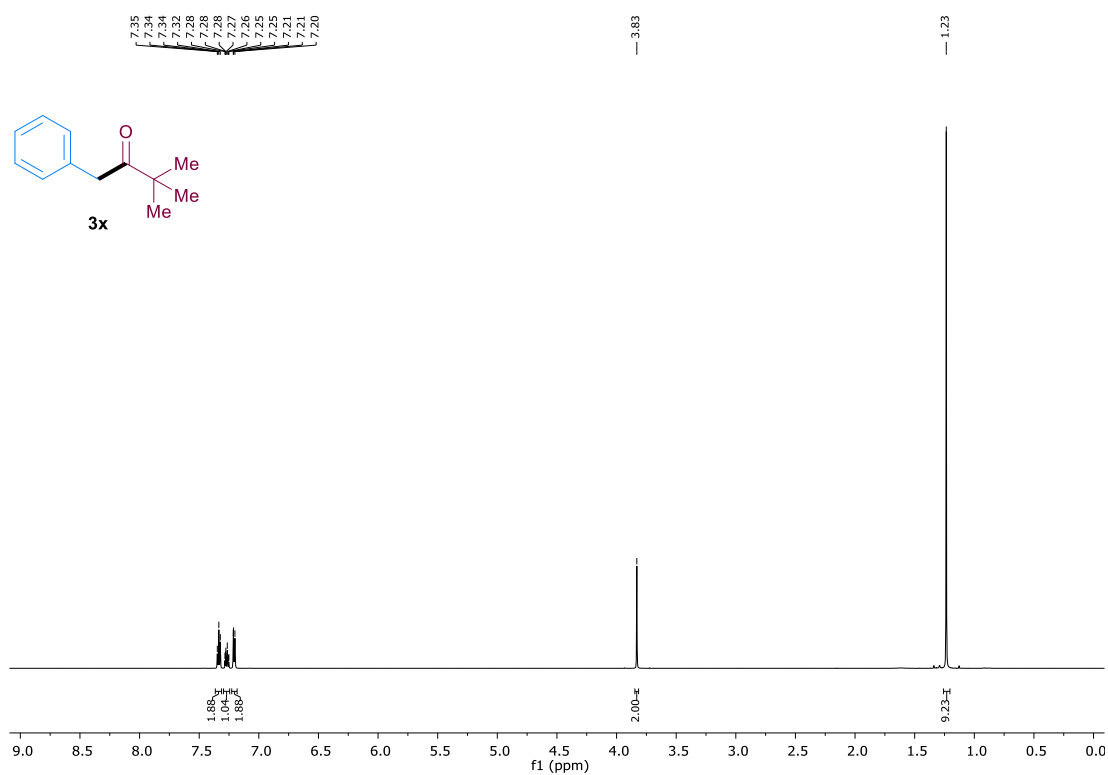

**<sup>13</sup>C-NMR (3x) [151 MHz, CDCl<sub>3</sub>]**

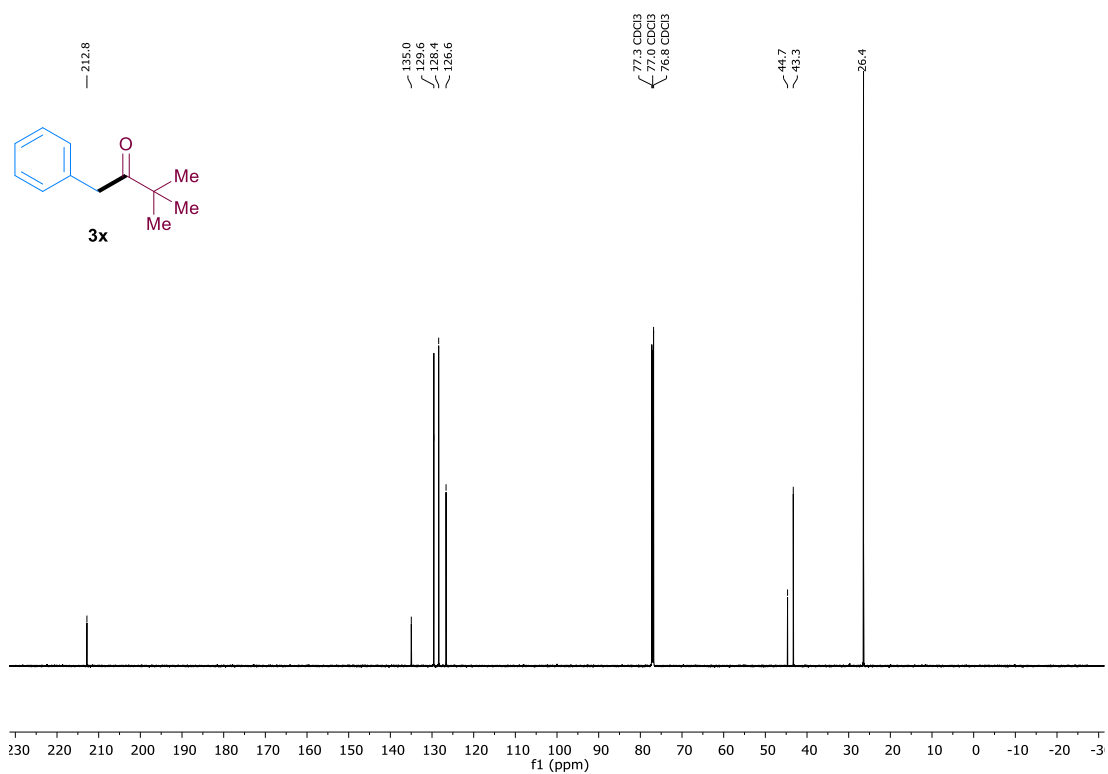

**<sup>1</sup>H-NMR (PS-4) [600 MHz, CDCl<sub>3</sub>]**

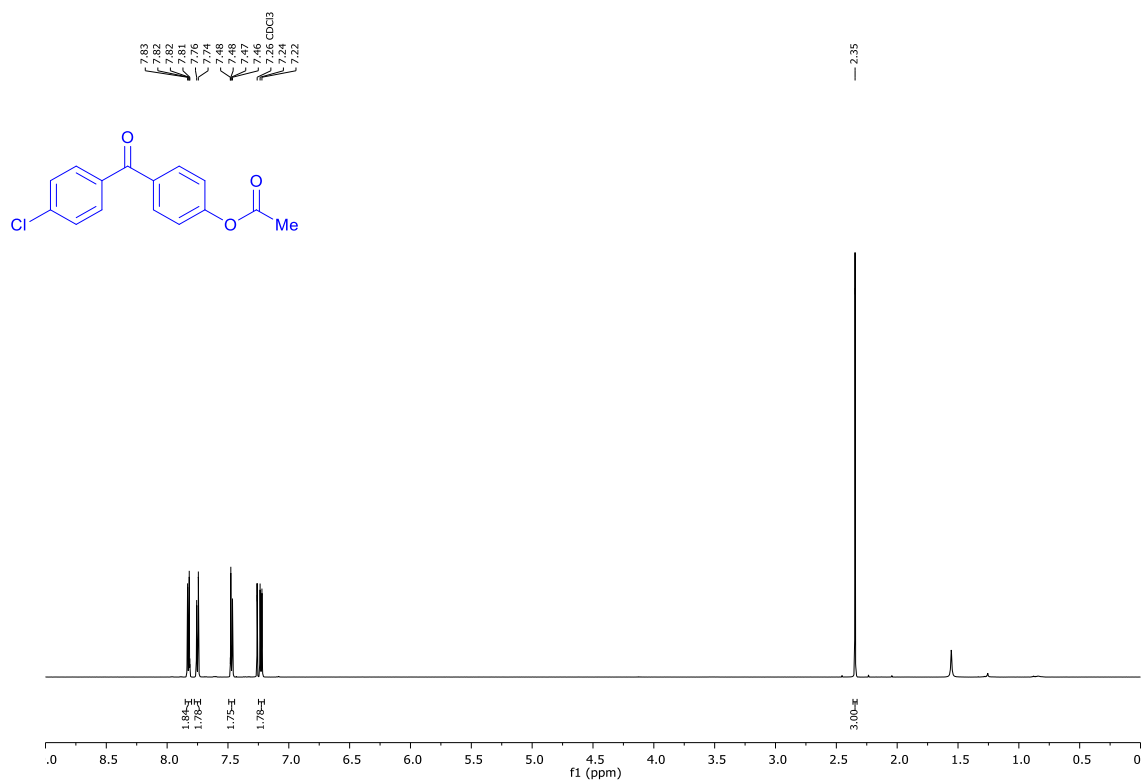

**<sup>13</sup>C-NMR (PS-4) [151 MHz, CDCl<sub>3</sub>]**

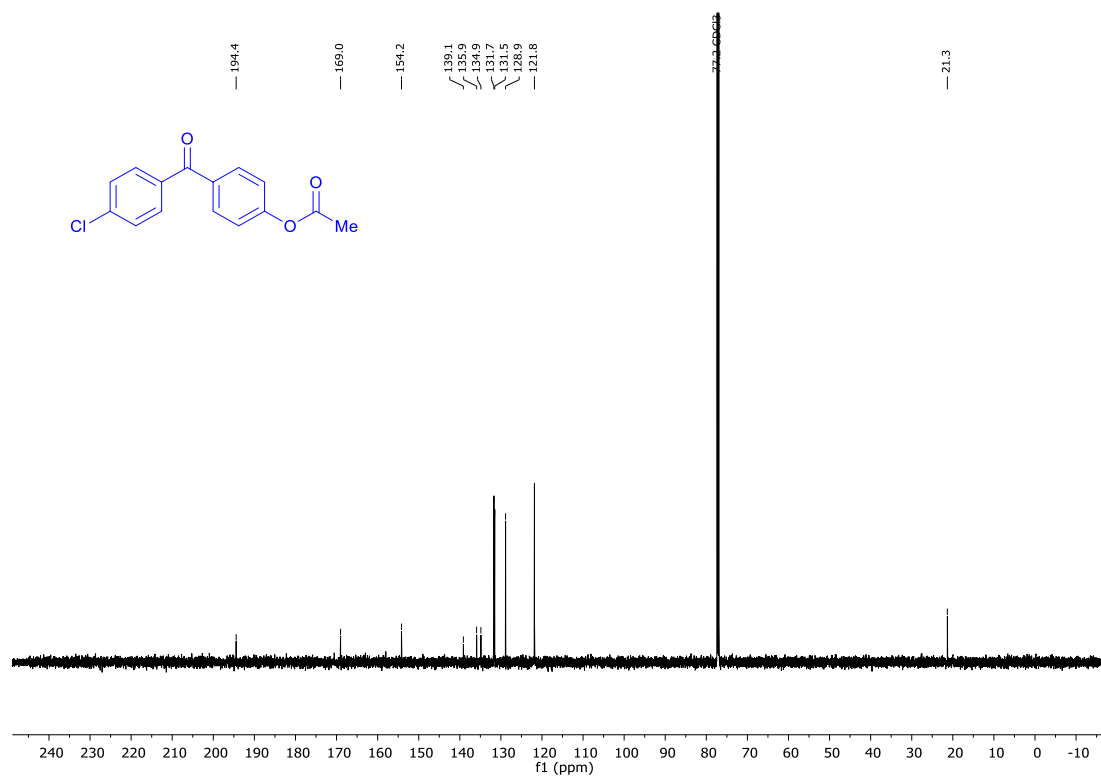

**<sup>1</sup>H-NMR (PS-5) [400 MHz, CDCl<sub>3</sub>]**

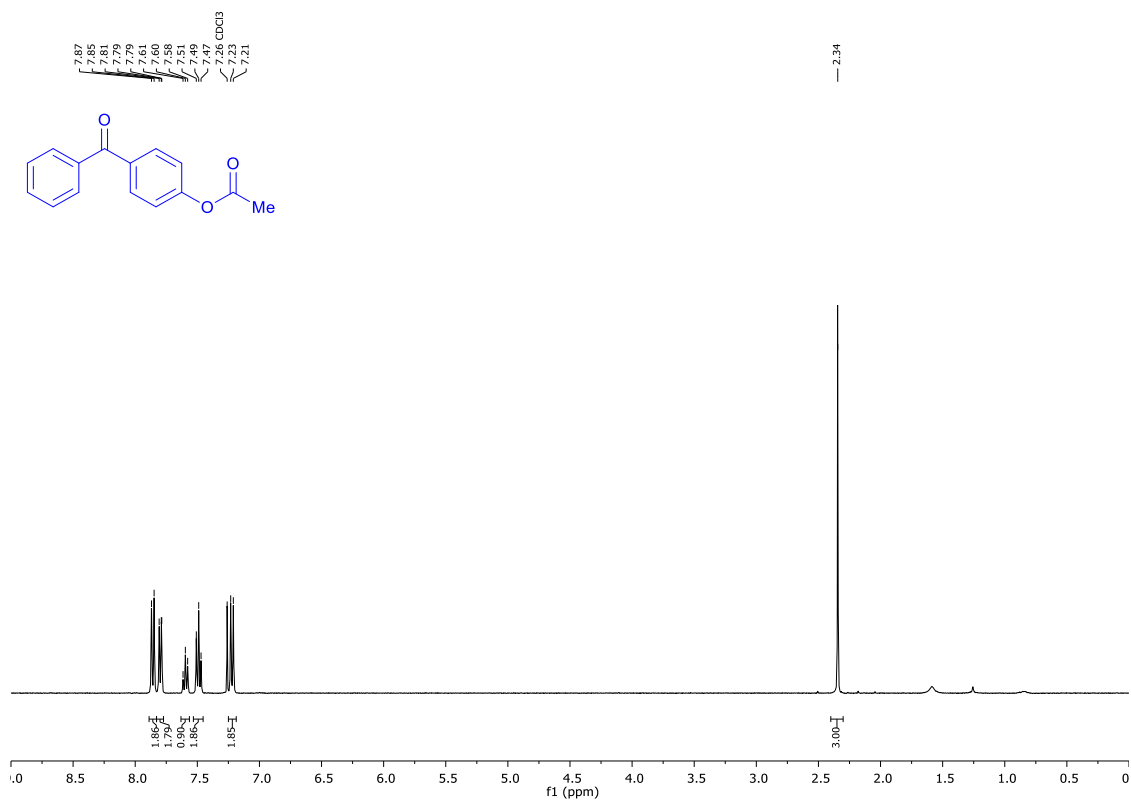

**<sup>13</sup>C-NMR (PS-5) [151 MHz, CDCl<sub>3</sub>]**

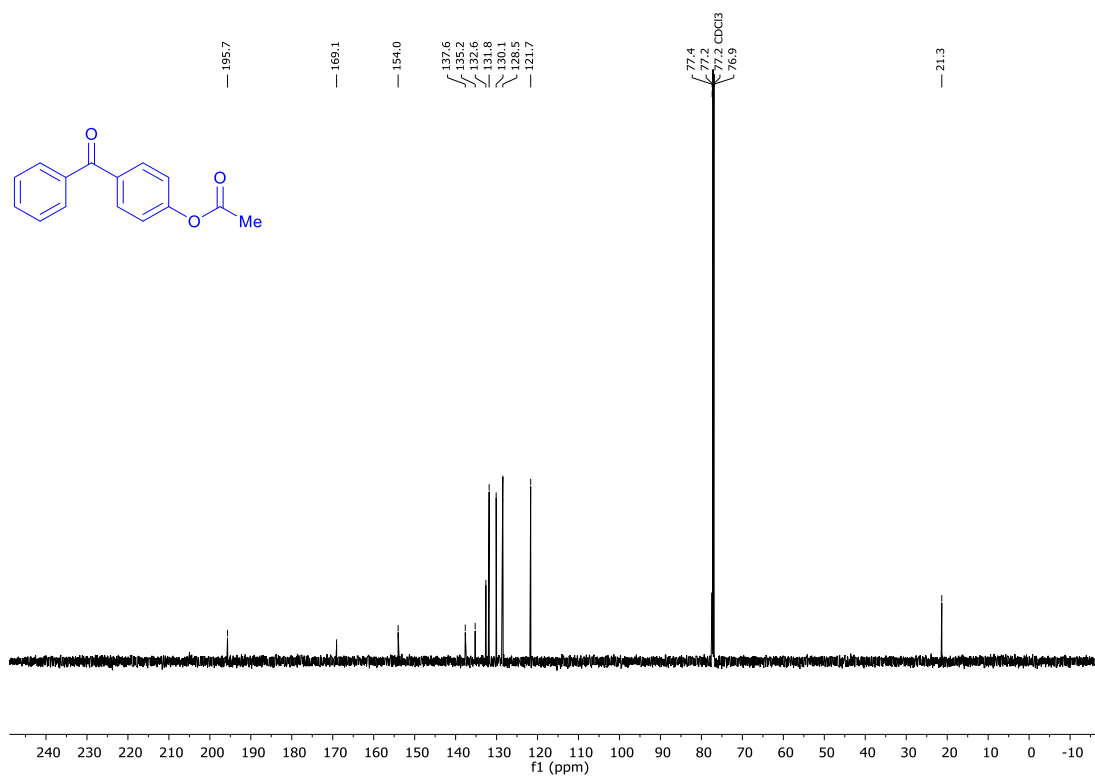

Supplement: d0cc01480j1.pdf [file d0cc01480j1.pdf]
